# Supplementary material for: Association of Fetal Growth Restriction With Neurocognitive Function After Repeated Antenatal Betamethasone Treatment vs Placebo: Secondary Analysis of the ACTORDS Randomized Clinical Trial
Source: PubMed Central journal article supplement (PMC6484607; doi:10.1001/jamanetworkopen.2018.7636), 2019-02-01
Supplement: jamanetwopen-2-e187636-s001.pdf [file jamanetwopen-2-e187636-s001.pdf]

6  
7  
8  
9  
10  
11  
12  
13  
14  
15  
16  
17  
18  
19  
20  
21  
22  
23  
24  
25  
26

**EARLY SCHOOL-AGE OUTCOMES AFTER EXPOSURE  
TO REPEAT ANTENATAL CORTICOSTEROIDS – A  
RANDOMISED CONTROLLED TRIAL**

*New Zealand Study Protocol*

|                                  |                                         |    |
|----------------------------------|-----------------------------------------|----|
| <b>NZ Investigators</b>          | <b>AUSTRALASIAN COMMITTEE</b>           | 27 |
| Prof. Jane Harding               | Caroline Crowther                       | 28 |
| Prof. Wayne Cutfield             | Ross Haslam                             | 29 |
| Dr Malcolm Battin                | Lex Doyle                               | 30 |
| Dr Stuart Dalziel                | Peter Anderson                          | 31 |
| Dr Christopher McKinlay          | Janet Hiller                            | 32 |
| Mrs Coila Bevan (Research Nurse) | Jane Harding                            |    |
|                                  | Jeffrey Robinson                        |    |
| Liggins Institute                | Maternal Perinatal Clinical Trials Unit |    |
| University of Auckland           | Department of Obstetrics & Gynaecology  |    |
| Private Bag 92019                | University of Adelaide                  |    |
| Auckland Mail Centre             | Women's & Children's Hospital           |    |
| Auckland 1142                    | 72 King William Road                    |    |
|                                  | NORTH ADELAIDE SA 5006                  |    |
| Phone: +64 (9) 3737599 ext 82733 | Phone: +61 (8) 81617611                 |    |
| Fax: +64 (9) 3737497             | Fax: +61 (8) 8161 7652                  |    |
| Email: J.Harding@auckland.ac.nz  | Email: actords@adelaide.edu.au          |    |

33 **CONTENTS**

34

35 1 AIM.....3

36 1.1 Specific Aims .....3

37 1.2 Study Hypothesis.....3

38 2 SIGNIFICANCE.....3

39 2.1 Improved Outcomes for Preterm Babies .....3

40 2.2 Understanding the Developmental Origins of Adult Disease.....4

41 3 SCIENTIFIC BACKGROUND.....5

42 3.1 Preterm Birth and the Role of Corticosteroids .....5

43 3.2 Evidence for Single Course Antenatal Corticosteroids .....5

44 3.2.1 Time Window.....6

45 3.2.2 Childhood Outcomes.....6

46 3.2.3 Long-term Outcomes .....7

47 3.2.4 Maternal Outcomes .....7

48 3.3 Trials of Repeat Course Antenatal Corticosteroids .....7

49 3.3.1 Neonatal Outcomes .....8

50 3.3.2 ACTORDS .....9

51 3.3.3 Preschool Outcomes.....9

52 3.4 Current Evidence for the Beneficial and Adverse Effects of Repeat ACS.....10

53 3.4.1 Effect on Brain and Neurodevelopment.....10

54 3.4.2 Effect on Lung Function .....10

55 3.4.3 Effect on Growth & Body Composition .....11

56 3.4.4 Effect on Blood Pressure.....11

57 3.4.5 Effect on Glucose Homeostasis.....11

58 3.4.6 Effect on Cortisol.....11

59 3.5 Summary .....12

60 4 RESEARCH PLAN .....12

61 4.1 Design.....12

62 4.2 Subjects .....12

63 4.3 Primary Outcome.....12

64 4.4 Secondary Outcomes.....13

65 4.5 Data management and analyses.....14

66 4.6 Structure of assessments.....14

67 APPENDIX 1: PAEDIATRIC ASSESSMENT.....15

68 APPENDIX 2: PSYCHOLOGY ASSESSMENT.....17

69 APPENDIX 3: PHYSIOLOGICAL STUDIES.....18

70 REFERENCES.....21

71

72

73

74 **1 AIM**

75 The aim of this study is to assess whether there are additional health gains, without adverse effects, in  
 76 mid-childhood, after exposure to repeat doses of antenatal corticosteroids (ACS). We will study New  
 77 Zealand children at 6-8 years corrected age who took part in the ACTORDS trial (Australasian  
 78 Collaborative Randomised Trial of Repeat Doses of Corticosteroids), which randomised mothers at risk  
 79 of preterm birth at less than 32 weeks, after an initial course of ACS, to either weekly corticosteroids or  
 80 placebo. ACTORDS found that repeat ACS had clinically important beneficial effects on premature lung  
 81 disease. However, repeat ACS were also associated with a small negative effect on fetal growth and data  
 82 from animal studies suggests that increased fetal exposure to ACS may adversely affect brain  
 83 development and increase the long-term risk of metabolic and cardiovascular disease. Thus the short-term  
 84 benefits of repeat ACS could be offset by these other harms. There is currently no strong evidence  
 85 regarding the effects of repeat ACS beyond the age of 2 years. Therefore, we will study a range of health  
 86 outcomes as well as physiological variables known to be associated with the development of adult disease  
 87 in order to determine if there is overall benefit from repeat ACS at 6-8 years corrected age.

88 **1.1 Specific Aims**

89 The study consists of three components: 1) general health and neurosensory function (paediatric  
 90 assessment); 2) cognition and behaviour (psychological assessment); and 3) metabolic, endocrine and  
 91 cardiovascular function (physiological studies). Parts 1 and 2 will be conducted in the entire Australasian  
 92 ACTORDS cohort but part 3 will be conducted only in the New Zealand subgroup. More specifically this  
 93 study will investigate the following outcomes:

94 table 1-1: ACTORDS NZ 6-8y Follow-up Study Outcomes

|                                 |                                                                                                                                                            |
|---------------------------------|------------------------------------------------------------------------------------------------------------------------------------------------------------|
| <b>Paediatric Assessment</b>    | Mortality<br>Physical health<br>Blood pressure<br>Growth<br>Lung function<br>Sensorineural impairment<br>Chronic illness<br>Health related quality of life |
| <b>Psychological Assessment</b> | General cognitive ability<br>Attention & executive function<br>Memory & learning<br>Visual perception<br>Academic achievement<br>Behaviour                 |
| <b>Physiological Studies</b>    | Ambulatory blood pressure<br>Bone mass & body composition<br>Insulin sensitivity and glucose control<br>Basal and stress cortisol<br>Renal function        |

95 **1.2 Study Hypothesis**

96 The study hypothesis is that antenatal administration of repeat ACS to women who remain at risk of  
 97 preterm birth at less than 32 weeks gestation, after an initial course of ACS, has beneficial effects on their  
 98 children at 6-8 years corrected age with regard to the outcomes in table 1-1.

99 **2 SIGNIFICANCE**

100 **2.1 Improved Outcomes for Preterm Babies**

101 This study will provide the first reliable evidence of the effects of repeat antenatal corticosteroids up to  
 102 school age. This information will be of immediate clinical relevance and potentially improve outcomes  
 103 after preterm birth.

104 Preterm birth is a major health issue in New Zealand, affecting approximately 7% of births or 4000 babies  
 105 each year (New Zealand Health Information Service 2008). Despite advances in obstetric care the

106 proportion of babies born preterm is actually increasing, a trend that is consistent throughout the  
 107 developed world (Callaghan 2006; Craig 2002; Joseph 1998; Tucker 2004). The care of these small  
 108 babies consumes considerable health care resources and places significant stress on families. Prematurity  
 109 is responsible for 75% of neonatal deaths (Hack 1999) and is the leading cause of infant mortality  
 110 (Callaghan 2006).

111 ACS substantially reduce the occurrence and severity of respiratory distress syndrome (RDS), which is  
 112 the principle cause of neonatal mortality and morbidity (Roberts 2006). However, there is no evidence  
 113 that the benefits of a single course of ACS persist beyond 7 days. Furthermore, babies born more than 7  
 114 days after a single course of ACS may have increased mortality and morbidity (McLaughlin 2003). This  
 115 is an important clinical problem as between 25% (McLaughlin 2002) and 50% (Modi 2001) of women  
 116 who receive a course of ACS remain undelivered 7-14 days later but continue to have increased risk of  
 117 preterm birth. These babies would be eligible for repeat ACS, which have been shown to have additional  
 118 benefits for RDS and serious neonatal morbidity (Crowther 2011). However, data from both human  
 119 observational and animal experimental studies suggests that increased exposure to ACS may cause both  
 120 short and long-term adverse effects in various organ systems, although interpretation of these data is not  
 121 straightforward.

122 To date, human randomised studies of repeat ACS have not extended beyond 2 years corrected age. Two  
 123 of these studies found that repeat ACS were associated with small reductions in fetal growth (Crowther  
 124 2006; Wapner 2006), but the effects were rapidly reversed after birth and no differences in growth were  
 125 seen at 2 years corrected age. One trial found that repeat ACS may be associated with an increased risk of  
 126 cerebral palsy, although the result was not statistically significant (Wapner 2007). ACTORDS children  
 127 exposed to repeat ACS had increased attention difficulties at 2 years corrected age (Crowther 2007).  
 128 These findings justify caution with regard to the use of repeat ACS and long-term follow-up of  
 129 randomised cohorts is urgently needed before repeat ACS can be safely recommended for routine clinical  
 130 use, despite their proven short-term benefit.

131 ACTORDS will be the first and possibly the only randomised trial of repeat ACS to assess children at  
 132 school age. The Canadian MACS trial, which recently completed recruitment, is also planning long-term  
 133 follow-up but will assess children only at 5 years corrected age. However, many important outcomes,  
 134 such as lung function and educational achievement and learning cannot be readily assessed until school  
 135 age. This study of ACTORDS children will also be the first detailed investigation of the long-term  
 136 physiologic effects of repeat ACS in humans, which is another important area of concern.

## 137 **2.2 Understanding the Developmental Origins of Adult Disease**

138 The developmental origins of health and disease (DOHaD) has become an important paradigm in the  
 139 study of the pathogenesis of adult disease (Gluckman, Hanson, 2005). A central tenet of the paradigm is  
 140 that organisms can undergo long-term structural or functional changes in early development in response  
 141 to nutritional and other environmental cues. These long-term effects may be mediated by epigenetic  
 142 changes in gene expression (nuclear or mitochondrial), altered stem cell allocation, or resetting of  
 143 homeostatic mechanisms (Barker 2006; Pike 2008). Early developmental responses can contribute to later  
 144 disease risk if there is a mismatch between fetal and adult environments, such that early phenotypic  
 145 adaptations limit an individual's ability to adequately respond to subsequent environmental challenges  
 146 (Godfrey 2007).

147 Early developmental adaptations appear to occur not only in response to adversity but also within the  
 148 normal range of growth and development (Barker 2006). For example, the inverse relationship between  
 149 birth weight and cardiovascular mortality is continuous throughout the normal birth weight range (Seckl  
 150 2001). Increasingly, early developmental factors are being linked to other chronic illnesses including  
 151 osteoporosis (Cooper 1997; Godfrey 2001), depression (Thompson 2001), schizophrenia (Gluckman,  
 152 Cutfield, 2005), and obstructive respiratory disease (Lucas 2004; Shaheen 2004). There is now also  
 153 evidence to suggest that early developmental adaptations can be inherited by non-genomic mechanisms  
 154 (Gluckman 2007).

155 An important potential mechanism by which environmental factors may cause long-term effects *in utero*  
 156 is fetal overexposure to maternal glucocorticoids. For example, in animals it has been shown that  
 157 maternal undernutrition impairs the placental barrier to cortisol, thereby exposing the fetus to excess  
 158 maternal glucocorticoids, despite normal circulating maternal cortisol levels. This in turn leads to lower

159 birth weight, altered postnatal hypothalamic-pituitary-adrenal (HPA) axis function and hypertension  
 160 (Edwards 1993; Langley-Evans 1997; Seckl 2001). Similar changes in the offspring occur following  
 161 maternal administration of synthetic corticosteroids, which are not metabolised by placental 11-beta-  
 162 hydroxysteroid dehydrogenase (11 $\beta$ HSD) (Seckl 2001).

163 Given the potential association between corticosteroids and fetal programming it is important that repeat  
 164 ACS receive careful longitudinal evaluation. This study will provide the first human experimental  
 165 evidence of the metabolic and cardiovascular effects of repeat antenatal glucocorticoid exposure at school  
 166 age. These data may offer further insights into the mechanisms underlying the developmental origins of  
 167 disease.

### 168 **3 SCIENTIFIC BACKGROUND**

#### 169 **3.1 Preterm Birth and the Role of Corticosteroids**

170 Preterm babies are at high risk of RDS due to immature lung development. Incomplete alveolar  
 171 development limits the surface area available for gas exchange, while qualitative and quantitative  
 172 deficiencies in surfactant cause lung collapse (Roberts 2006). RDS affects 87% of infants less than 28  
 173 weeks, 64% at 29-30 weeks, 50% at 31-32 weeks and 20% at 33-34 weeks (Boggess 2005). It is the  
 174 principal cause of early neonatal mortality and morbidity and is an important risk factor for  
 175 neurodevelopmental impairment. RDS is associated with cerebroventricular haemorrhage and  
 176 periventricular leucomalacia, both of which contribute to cerebral palsy and other long-term disability.  
 177 Severe RDS has also been linked to a global decrease in brain volume on volumetric magnetic resonance  
 178 imaging (MRI) (Thompson 2007).

179 One of the most significant discoveries in perinatal medicine was the recognition that fetal exposure to  
 180 corticosteroids induces lung maturation, especially surfactant pathways, and thus reduces the incidence  
 181 and severity of RDS. Liggins and Howie pioneered this work in New Zealand in the 1960s at National  
 182 Women's Hospital and conducted the first randomised controlled trial of ACS. The Auckland Steroid  
 183 Trial remains the largest (1,142 mothers; 1,218 babies) and most significant study of single course ACS  
 184 ever to be performed. \* Numerous other smaller trials have confirmed the beneficial effects of ACS for  
 185 RDS (Roberts 2006).

186 ACS are inexpensive, simple to use and produce significant benefit for babies born preterm. The NIH has  
 187 concluded that ACS are 'a rare example of a technology that yields substantial cost savings in addition to  
 188 improving health' (National Institutes of Health 1994). ACS have become an accepted cornerstone of  
 189 modern perinatal practice. The original Liggins and Howie protocol, which administered two 12mg doses  
 190 of betamethasone 24 hours apart to women at risk of preterm birth < 34 weeks gestation, continues to be  
 191 the most widely used treatment regimen.\*\*

#### 192 **3.2 Evidence for Single Course Antenatal Corticosteroids**

193 The most recent Cochrane systematic review of single course ACS, which included 21 randomised trials  
 194 and 4269 babies, found significant neonatal benefit including reductions in RDS (occurrence, severity,  
 195 and respiratory support), neonatal death, cerebroventricular haemorrhage, necrotising enterocolitis, and  
 196 early sepsis (table 3-1) (Roberts 2006). Although 8 of these trials (848 babies) permitted repeat doses of  
 197 ACS, the results of the systematic review were not affected by their inclusion. ACS showed a similar  
 198 relative benefit for RDS when administered between 26 to 34 weeks gestation (table 3-1). Although no  
 199 benefit was seen when administered <26 weeks gestation it is possible that this is a type 2 error given the  
 200 small number of babies in this subgroup and the wide confidence intervals. Because RDS is common <32  
 201 weeks gestation the absolute benefit of ACS was large, with a number needed to benefit (NNTB) of 5 and  
 202 9 when ACS were administered between 26-29 weeks and 30-32 weeks respectively. Between 32-33

---

\* A complete analysis of the Auckland Steroid Trial data was never published. The paper that is widely quoted (Pediatrics 1972;50(4):515-25) included the results of only 287 women. The remaining data was published in various conference reports. All data was extracted for the most recent Cochrane systematic review (Roberts 2006).

\*\* After the first 717 women were recruited into the Auckland Steroid Trial the dose of betamethasone was increased to a total 48mg but no additional benefit was found.

203 weeks the NNTB was 15. Although ACS reduced the risk of RDS there was no effect on the risk of  
 204 chronic lung disease. Current evidence is that there is no adverse effect on fetal survival or neonatal  
 205 outcomes if delivery occurs within 7 days (Roberts 2006).

206 table 3-1: Benefits of Single Course ACS by Gestational Age at First Dose (Roberts 2006)

|                                 | All Gestations                    | n    | <26wk                   | n  | 26-29wk                | n   | 30-32wk                | n   | 33-34wk                | n   |
|---------------------------------|-----------------------------------|------|-------------------------|----|------------------------|-----|------------------------|-----|------------------------|-----|
| RDS                             | RR 0.66<br>(0.59-0.73)<br>NNTB 8  | 4038 | RR 2.86<br>(0.37-21.87) | 24 | RR 0.49<br>(0.34-0.72) | 242 | RR 0.56<br>(0.36-0.87) | 361 | RR 0.53<br>(0.31-0.91) | 434 |
| Neonatal death                  | RR 0.69<br>(0.58-0.81)<br>NNTB 22 | 3956 | RR 1.87<br>(0.61-5.72)  | 27 | RR 0.67<br>(0.45-0.99) | 227 | RR 0.51<br>(0.23-1.11) | 195 | RR 1.11<br>(0.49-2.48) | 339 |
| Cerebro-ventricular haemorrhage | RR 0.54<br>(0.43-0.69)<br>NNTB 21 | 2872 | RR 1.2<br>(0.24-6.06)   | 27 | RR 0.45<br>(0.21-0.95) | 227 | RR 0.23<br>(0.03-2)    | 295 | RR 1.11<br>(0.23-5.4)  | 339 |
| Necrotising enterocolitis       | RR 0.46<br>(0.29-0.74)<br>NNTB 30 | 1675 |                         |    |                        |     |                        |     |                        |     |
| Early Sepsis                    | RR 0.56<br>(0.38-0.85)<br>NNTB 27 | 1319 |                         |    |                        |     |                        |     |                        |     |

207 [RR= relative risk; ( ) = 95% confidence interval; NNTB = number needed to benefit; n = infants]

208 The Cochrane review did not show any significant effect on RDS beyond 34 weeks (35-36 weeks: RR  
 209 0.61, 95%CI 0.11-3.26, 189 babies). However, this may represent a type 2 error as other studies have  
 210 shown that ACS continue to have beneficial respiratory effects at term (Stutchfield 2005). Nevertheless,  
 211 ACS are not generally used >34 weeks gestation because of the low incidence of RDS.

212 **3.2.1 Time Window**

213 The benefits of ACS appear to be short lived. The Cochrane systematic review of single course ACS  
 214 found that there was no benefit if the fetus remained undelivered 7 days after treatment with ACS (table  
 215 3-2) (Roberts 2006). Peak benefit occurred sometime after 24 hours but before 7 days. While caution is  
 216 required with post hoc analysis (Gates and Brocklehurst 2007) there is currently no evidence to support  
 217 benefit from ACS beyond 7 days. Furthermore, delaying delivery by more than 7 days following a course  
 218 of ACS may be harmful. In the Cochrane review such fetuses were smaller at birth (mean difference in  
 219 birth weight 147g) (Roberts 2006) and in another meta-analysis (862 babies) had increased neonatal  
 220 mortality (RR 3.24, 95% CI 1.32-7.96) (McLaughlin 2003).

221 table 3-2: Benefits of Single Course ACS According to Time to Birth (Roberts 2006)

|                                 | <24hr                  | n   | <48hr                  | n   | 24hr to 7days          | n    | >7days                  | n   |
|---------------------------------|------------------------|-----|------------------------|-----|------------------------|------|-------------------------|-----|
| RDS                             | RR 0.87<br>(0.66-1.15) | 517 | RR 0.63<br>(0.43-0.93) | 374 | RR 0.46<br>(0.35-0.6)  | 1110 | RR 0.82<br>(0.53-1.28)  | 988 |
| Neonatal death                  | RR 0.53<br>(0.29-0.96) | 295 | RR 0.49<br>(0.3-0.81)  | 339 | RR 0.74<br>(0.51-1.07) | 563  | RR 1.45<br>(0.0.75-2.8) | 561 |
| Cerebro-ventricular haemorrhage | RR0.54<br>(0.21-1.36)  | 264 | RR 0.26<br>(0.09-0.75) | 339 | RR 0.51<br>(0.23-1.13) | 482  | RR 2.01<br>(0.37-10.86) | 453 |

222 [RR= relative risk; ( ) = 95% confidence interval; n = infants]

223 **3.2.2 Childhood Outcomes**

224 ACS appear to be neuro-protective, with a strong trend towards reduced developmental delay (RR 0.49,  
 225 95%CI 0.24-1) and cerebral palsy (RR0.6, 95%CI 0.34-1.03) (Roberts 2006). An observational study also  
 226 found that single course ACS were associated with a higher intelligence quotient (WISC-3 full scale mean  
 227 difference 6.2, 95%CI 0.8-11.6) at age 14 years in very low birth weight children (Doyle 2000). However,  
 228 follow-up of a randomised cohort at age 6 years (304 children), found that ACS exposed children had  
 229 lower Raven Progressive Matrices scores (mean difference 1.2 or 0.3SD, p=0.05), which is a test of  
 230 general intelligence or abstract thinking (MacArthur 1982). The effect was greatest in boys (mean  
 231 difference 1.6, p=0.01). This finding could not be replicated in a Dutch follow-up study at 10-12 years  
 232 (Schmand 1990), although the study was small (90 children; follow-up rate 88%) and not powered to  
 233 detect clinically important differences in intelligent quotient (IQ).

234 In an observational study ACS increased systolic and diastolic blood pressure at age 14 years (Doyle  
235 2000) but a randomised study showed no effect at age 6 years (Dalziel 2004). Childhood growth is  
236 unaffected by single course ACS (Roberts 2006). Lung function has been assessed only in an  
237 observational study but was also unaffected (Doyle 2000).

### 238 3.2.3 Long-term Outcomes

239 The use of single course ACS for preterm birth <34 weeks has not been shown to cause any long-term  
240 clinical harm, at least into early adulthood. Follow-up of a Dutch randomised cohort at age 20 years (81  
241 neonatal survivors; follow-up rate 74%) found that ACS had no effect on growth, blood pressure,  
242 cognition, psychopathology, puberty onset, sexual function, education, or socioeconomic status (Dessens  
243 2000). Thirty year follow-up from the Auckland Steroid Trial (534 neonatal survivors; follow-up rate  
244 56%) similarly showed no differences in blood pressure, obesity, cholesterol, morning cortisol, lung  
245 function, body size, bone mass, employment status, IQ, concentration, psychiatric morbidity or health  
246 related quality of life (Dalziel, Lim, 2005; Dalziel, Walker, 2005; Dalziel, Fenwick, 2006; Dalziel, Rea,  
247 2006; Dalziel 2007). However, ACS exposed subjects showed evidence of insulin resistance on oral  
248 glucose challenge, although there was no difference in the incidence of diabetes (Dalziel, Walker, 2005).  
249 The clinical significance of this finding for later adulthood remains unknown, but insulin resistance is a  
250 risk factor for the later development of diabetes and cardiovascular disease.

### 251 3.2.4 Maternal Outcomes

252 The Cochrane review found that maternal outcomes are unaffected by single course ACS (Roberts 2006),  
253 although the analysis by McLaughlin (2003) found increased rates of chorioamnionitis if delivery did not  
254 occur before 7 days (RR2.91, 95%CI 1.25-6.74). Single course ACS are safe and beneficial in women  
255 with premature rupture of membranes (Harding 2001; Roberts 2006) and pregnancy related hypertension  
256 syndrome (Roberts 2006).

### 257 3.3 Trials of Repeat Course Antenatal Corticosteroids

258 Liggins and Howie recognised in the first report of the Auckland Steroid Trial (Liggins 1972) that ACS  
259 did not appear to have benefit for RDS beyond 7 days and suggested that there may be benefit in giving  
260 repeat doses. In some centres this became standard practice and by the late 1990s the use of repeat doses  
261 was quite widespread (Brocklehurst 1999; Quinlivan, Evans, 1998) despite a lack of strong evidence to  
262 support their use. Although some animal studies suggested that repeat doses may be more effective, for  
263 example, improving lung function in sheep (Ikegami 1997), reports of efficacy in humans were  
264 conflicting (Banks 1999; Elimian 2000). A body of evidence also started to emerge that raised concerns  
265 about the safety of exposing fetuses to higher doses of glucocorticoids. Animal models demonstrated fetal  
266 growth restriction (Ikegami 1997; Quinlivan, Archer, 1998), impaired cerebral development (Dunlop  
267 1997; Huang 1999), altered hypothalamic-pituitary-adrenal axis (Ikegami 1997) and emphasematous  
268 alveolar development (Tschanz 1995; Willet 2001). Observational data in humans also pointed to  
269 impaired fetal growth (Abbasi 2000; Banks 1999; French 1999), increased perinatal mortality (Banks  
270 1999), altered brain maturation (Modi 2001), poorer neurodevelopmental outcome (Spinillo 2004), and  
271 hyperactivity (French 2004).

272 In 2000 the NIH called for a moratorium on the use of repeat ACS until there was adequate evidence from  
273 randomised trials (National Institutes of Health 2000). Four randomised trials of weekly ACS have now  
274 been completed: one in Australasia (ACTORDS) (Crowther 2006), two in the United States of America  
275 (USA) (Guinn 2001; Wapner 2006), and one in Canada (Murphy 2007 abstract). ACTORDS and the  
276 National Institute of Child Health and Human Development (NICHD) Maternal Fetal Medicine  
277 Network (MFMN) trial have both completed 2-year follow-up studies (Crowther 2007; Wapner 2007).  
278 Guinn et al have not conducted any long-term follow-up. Both American trials were terminated early  
279 because of concerns about neurological harm (Guinn 2001) and impaired fetal growth (Wapner 2006)  
280 combined with small absolute benefits and difficulties with recruitment (Wapner 2006).

281

282

283

284

table 3-3: Randomised Controlled Trials of Repeat ACS

|                               | Guinn<br>2001                      | Wapner / MFMN<br>2006              | Crowther / ACTORDS<br>2006               | Murphy/<br>MACS 2007  |
|-------------------------------|------------------------------------|------------------------------------|------------------------------------------|-----------------------|
| Country                       | USA                                | USA                                | Australia & NZ                           | Canada                |
| Study dose                    | Betamethasone 24mg<br>weekly <34wk | Betamethasone 24mg<br>weekly <34wk | Betamethasone 11.4mg<br>weekly <32wk     | Fortnightly<br><34 wk |
| Calculated<br>sample size     | 1000                               | 2400                               | 980                                      | 1900                  |
| Total women<br>recruited      | 502                                | 495                                | 982                                      | 1858                  |
| Mean gestation<br>at entry    | 28                                 | 28                                 | 28                                       |                       |
| Mean gestation<br>at delivery | 33                                 | 34                                 | 32                                       |                       |
| > 3 study doses               | 40%                                | 62%                                | 25%                                      |                       |
| Paediatric<br>follow-up       | ? none                             | 2yr (completed)                    | 2yr (completed)<br>6-8yr (this protocol) | 2yr, 5yr              |

285 Two small pilot studies have also been published; one in Canada (Aghajafari, Murphy, Ohlsson, 2002, 12  
 286 women) and the other in the USA (McEvoy 2002, 37 women). Another trial was started in the United  
 287 Kingdom, TEAMS (trial of the effects of antenatal multiple courses of steroids versus a single course),  
 288 but was stopped in 2003 after recruiting 154 women, because of inadequate funding. There are also two  
 289 randomised trials examining the effect of giving only a second course of ACS. One of these studies,  
 290 which used a rescue protocol, was terminated early because of increased severity of RDS in the treatment  
 291 arm (Peltoniemi 2007). Another trial by Obstetrix Medical Group, USA, which gives the second course of  
 292 ACS after 14 days, is ongoing (NCT00201643).

293 **3.3.1 Neonatal Outcomes**

294 The current Cochrane systematic review of repeat ACS (2028 women) includes ACTORDS, the two USA  
 295 trials and the pilot studies by Aghajafari and McEvoy (Crowther 2011). This review found that the  
 296 administration of weekly ACS to women at risk of preterm birth <34 weeks gestation reduced all RDS,  
 297 severe RDS and a composite outcome of serious morbidity, including chronic lung disease, severe  
 298 cerebroventricular haemorrhage, necrotising enterocolitis, and periventricular leucomalacia (table 3-4).  
 299 However, there was no effect on individual morbidity outcomes. In keeping with the decrease in RDS,  
 300 repeat ACS also reduced oxygen and surfactant use, and patent ductus arteriosus (PDA) requiring  
 301 treatment but not other respiratory support parameters. There were no differences in fetal and neonatal  
 302 mortality, neonatal or maternal infection, or chronic lung disease.

303

table 3-4: Benefits of Repeat ACS (Crowther 2011)

|                   | Treatment Effect               | n    |
|-------------------|--------------------------------|------|
| RDS               | RR 0.82 (0.72-0.93)<br>NNTB 17 | 2155 |
| Severe RDS        | RR 0.6 (0.48-0.75)<br>NNTB 15  | 2139 |
| Serious morbidity | RR 0.79 (0.67-0.93)<br>NNTB 21 | 2157 |

304

[RR= relative risk; ( ) = 95% confidence interval; NNTB = number need to benefit; n = infants]

305 There were no differences in mean birth weight, head circumference, or length. However, two trials  
 306 showed small reductions in fetal growth in the repeat ACS exposed groups: ACTORDS found lower  
 307 mean Z-scores for birth weight and head circumference (absolute difference 0.13 and 0.17 respectively);  
 308 the MFMN trial found an increase in small for gestational age (<10<sup>th</sup> percentile) babies, which in post hoc  
 309 analysis was confined to those infants receiving 4 or more study doses. Both trials reported rapid neonatal  
 310 catch-up growth so that no differences in size were seen at time of discharge.

311



### 3.3.2 ACTORDS

The Australasian Collaborative Trial of Repeat Doses of Corticosteroids (ACTORDS) assessed whether repeat doses of ACS, given to women who remained at risk of preterm birth at less than 32 weeks gestation, reduced the risk of neonatal respiratory disease without adverse effects (Crowther 2006). Women were recruited to the trial if they had ongoing risk of preterm birth 7 or more days after an initial course of ACS and were <32 weeks gestation. Women were excluded if they were in the second stage of labour, had chorioamnionitis needing urgent delivery, had mature lung development, or if further corticosteroid therapy was judged to be essential. Approximately 44% of the eligible women who were asked to take part in the study gave consent. Participants were randomised to weekly doses of betamethasone 11.4mg (celestone chronodose) (n = 489) or saline placebo (n = 493), continuing up to 32 weeks gestation. Randomisation was stratified by centre, gestation, and number of fetuses. Of 1146 infants alive at randomisation there were 1090 survivors to initial discharge home, of whom 342 were from New Zealand. The mean gestational age of both groups at initial steroids was 26 weeks, and at trial entry and birth it was 28 and 32 weeks respectively.

ACTORDS found that repeat doses of ACS had a beneficial effect on respiratory morbidity and PDA (table 3-5). There was no effect on survival, chronic lung disease or other morbidity but the repeat ACS group had reduced combined serious morbidity, defined as air-leak syndrome, PDA, oxygen use at 36 weeks postmenstrual age, severe cerebroventricular haemorrhage, periventricular leukomalacia, necrotizing enterocolitis, or retinopathy. Repeat ACS had a small negative effect on fetal growth (section 3.3.1). No other fetal or neonatal adverse clinical outcomes occurred.

The hypothalamic-pituitary-adrenal (HPA) axis was studied in two subgroups of infants. In Adelaide cord serum cortisol concentration was measured in 67 infants and salivary cortisol was studied in 51 infants (Ashwood 2006). No significant difference in mean cord serum cortisol concentration was found between those exposed to repeat ACS (34 infants) and those exposed to a single course of ACS (33 infants) (mean difference -26 nmol/L [95%CI 57, 5 nmol/L], p=0.10). Basal morning salivary cortisol concentration was lower in the repeat ACS group on day 7 of life (median 11.7 [18 infants] v. 18.2 [21 infants] nmol/L, p=0.04), but not on day 3, 14 or 21. Stress salivary cortisol was lower in the repeat ACS group on day 3 (median 11.9 [11 infants] v. 21.4 [16 infants] nmol/L, p = 0.02). In an Auckland subgroup no difference in morning plasma cortisol concentration was seen between those exposed to repeat ACS (30 infants) and those exposed to single course ACS (33 infants) on day 2 of life (249 v. 265 µmol/L) (Battin 2007). Some of these babies also received a metyrapone challenge, which tests the whole HPA axis. However, no differences in plasma cortisol or adrenocorticotropin (ACTH) concentrations were seen between the groups 3 hours after administration of metyrapone (17 v. 9 infants).

345

table 3-5: Benefits of Repeat ACS in ACTORDS (Crowther 2006)

|                   | Repeat ACS<br>n 567 | Placebo<br>n 577 | Adjusted RR<br>(95% CI) | NNTB<br>(95% CI) |
|-------------------|---------------------|------------------|-------------------------|------------------|
| RDS               | 186                 | 239              | 0.82 (0.71-0.95)        | 13 (8-48)        |
| Severe RDS        | 65                  | 114              | 0.6 (0.46-0.79)         | 13 (9-24)        |
| Surfactant use    | 24                  | 32               | 0.81 (0.68-0.97)        | 95 (56-601)      |
| PDA               | 40                  | 67               | 0.59 (0.4-0.87)         | 21 (14-66)       |
| Serious morbidity | 20                  | 26               | 0.79 (0.65-0.97)        | 106 (63-740)     |

Mothers in the repeat ACS group had a higher rate of caesarean section (RR 1.13, CI95% 1.02-1.24) but the overall rate of caesarean section in the trial was high at 62%. There were no differences in other maternal outcomes.

### 3.3.3 Preschool Outcomes

To date only two trials have reported outcomes beyond the neonatal period. ACTORDS found that infants exposed to repeat ACS were more likely to be rated by parents as intense (3.9 [SD 0.6] v. 3.8 [SD 0.7], p=0.03) and negative in mood (3.2 [SD 0.6] v. 3.1 [SD 0.7], p=0.03) on the Toddler Temperament Scale (Sewell 1988) at 12 months of age (Data presented to the Perinatal Society of Australia and New Zealand, 2006). Follow-up at 2 years corrected age, which included 97% of neonatal survivors, showed that repeat ACS had no effect on survival free of neurosensory disability, developmental quotient (Bayley Scales of Infant Development), body size, blood pressure, respiratory morbidity, use of health services, or child

357 behaviour scores. However, there was an increase in attention problems in those exposed to repeat ACS  
358 (6% v. 3.2%, adjusted RR 1.87 [95%CI 1.03-3.42]) (Crowther 2007).

359 The MFMN trial performed a similar follow-up at 2 years corrected age, assessing 83% of neonatal  
360 survivors, and also found no differences in growth, developmental quotient (Bayley Scales of Infant  
361 Development), and blood pressure. There was, however, a trend to reduced risk of asthma in the repeat  
362 ACS group (8.3% v. 14.4%, RR 0.6 [0.3-1.0],  $p=0.05$ ).

363 The MFMN 2 year follow-up study also found a trend to increased risk of cerebral palsy in the repeat  
364 ACS group, although the result was not statistically significant (2.9% v 0.5%, RR 5.7 [CI95% 0.7-46.7],  
365  $p=0.12$ ) and most of the cases of cerebral palsy occurred in those children that received 4 or more study  
366 doses (Wapner 2007). This may be a type 1 error given the low absolute event count (6 v. 1 cases of  
367 cerebral palsy) and the use of pregnancy as the denominator rather than babies, which is known to  
368 overestimate the incidence of outcomes (Gates 2007).

### 369 **3.4 Current Evidence for the Beneficial and Adverse Effects of Repeat ACS**

370 Corticosteroids can have potent effects in multiple organ systems due to their action as transcription  
371 regulators and also through the inhibition of cell growth and DNA replication. Normally the fetus is  
372 protected from exposure to maternal cortisol by placental inactivation via  $11\beta$ HSD. However, synthetic  
373 steroids, such as betamethasone, are a poor substrate for  $11\beta$ HSD and readily cross the placenta. Fetal  
374 tissues are particularly sensitive to corticosteroids, whether natural or synthetic, and corticosteroid  
375 exposure in early development can potentially cause long-term physiological changes. Therefore, it is  
376 essential that studies of repeat ACS include long-term follow-up of health outcomes.

377 The clinical evaluation of ACS is complicated by the fact that prematurity itself is associated with long-  
378 term physiological effects including elevated blood pressure (Doyle 2003; Irving 2000; Leon 2000),  
379 altered body composition (Fewtrell 2004; Uthaya 2005), impaired lung function (Anand 2003; Doyle  
380 2006; Galdes-Sebaldt 1989; Stick 2000) and insulin resistance (Hofman 2004). Therefore, the effects of  
381 ACS can be reliably evaluated only in randomised trials, which seek to overcome the effect of  
382 confounding variables such as gestation and size at birth at birth.

383 While current evidence shows that single course ACS do not cause any clinical adverse outcome into  
384 early adulthood, the same cannot be assumed for repeat course ACS. There is considerable evidence from  
385 animal studies to support a dose-response relationship, although this cannot be assumed to apply in  
386 human pregnancy (Aghajafari, Murphy, Matthews, 2002).

#### 387 **3.4.1 Effect on Brain and Neurodevelopment**

388 The reductions in premature lung disease associated with the use of repeat ACS could potentially lead to  
389 improved neurodevelopmental outcomes, although this benefit may be offset by possible adverse effects  
390 of repeat ACS on fetal brain development. In sheep, ACS have multiple effects on brain growth,  
391 including reduced brain size (Huang 1999), delayed myelination (Dunlop 1997; Huang 2001) and  
392 decreased long-term brain mass (Moss 2005). These effects are greatest following repeat ACS (Huang  
393 1999; Moss 2005). Guinea pigs and rats exposed to high doses of ACS have altered behaviour into  
394 adulthood, including increased anxiety, and impaired learning and memory (Owen 2005; Welberg 2001).

395 In human observational studies, repeat ACS are associated with reduced head circumference (French  
396 1999). Studies of long-term neurological outcome are conflicting with some studies showing increased  
397 risk of cerebral palsy (Shinwell 2000; Takahashi 2005) and developmental delay (Esplin 2000), but  
398 others show no effect (Hasbargen 2001; Kumar 2004; Thorp 2001) or even a reduction in the incidence of  
399 cerebral palsy (French 2004). However, the latter study also reported increased aggressive, destructive  
400 and hyperkinetic behaviour in childhood. Human randomised studies have currently only assessed the  
401 effects of repeat ACS up to 2-3 years corrected age (section 3.3.3). While these studies found that repeat  
402 ACS had no effect on developmental quotients, developmental testing at this age has limited predictive  
403 value for later cognitive ability (Rose 2003). Therefore, assessment at school age is needed to assess the  
404 overall effect of repeat ACS on neurodevelopment.

#### 405 **3.4.2 Effect on Lung Function**

406 Experimental evidence in both animals and humans shows that improvements in respiratory compliance  
407 and pulmonary function can be repetitively induced despite prior treatment with corticosteroids (Ikegami  
408 1997; McEvoy 2000; Stewart 1998). This suggests that repeat ACS may cause structural maturation of

409 the fetal lung in addition to stimulation of surfactant pathways. However, animal models have shown that  
 410 this can also lead to emphysematous-like alveolae (Tschanz 1995; Willet 2001). The effect of repeat ACS  
 411 on later lung function in humans has not been assessed in randomised studies.

### 412 3.4.3 Effect on Growth & Body Composition

413 A dose-dependent reduction in growth has been well documented in fetal lambs exposed to increasing  
 414 doses of antenatal betamethasone (Fowden 1996; Ikegami 1997). Permanent changes in body composition  
 415 have been seen in rats exposed to prenatal dexamethasone, with increased susceptibility to later obesity  
 416 (Cleasby 2003). Bone cortical thickness is also markedly reduced in adult rats after antenatal exposure to  
 417 dexamethasone (Swolin-Eide 2002).

418 In humans, repeat ACS have been associated with small reductions in fetal growth but rapid catch-up  
 419 growth is achieved post-natally (section 3.3.1). At 2-3 years of age no differences in size have been  
 420 detected in both observational (French 1999) and randomised (Crowther 2007; Wapner 2007) studies.  
 421 There are no randomised data on the effects of repeat ACS on growth and body composition at school  
 422 age.

### 423 3.4.4 Effect on Blood Pressure

424 ACS can cause long-term cardiovascular changes. Sheep exposed to a single course of ACS in early  
 425 gestation have life-long hypertension (Dodic 1998), as do rats exposed to dexamethasone in late gestation  
 426 (Levitt 1996).

427 In humans, single course ACS have been associated with late elevation of blood pressure in observational  
 428 (Doyle 2000) but not randomised studies (Dalziel 2004; Dalziel, Walker, 2005). One observational study  
 429 showed an association between repeat ACS and elevated neonatal blood pressure (Mildenhall 2006).  
 430 However, in randomised studies repeat ACS have not been shown to affect blood pressure at 2 years  
 431 corrected age (Crowther 2007; Wapner 2007). Nevertheless, long-term follow is needed to exclude  
 432 possible late cardiovascular effects of repeat ACS.

### 433 3.4.5 Effect on Glucose Homeostasis

434 Insulin resistance describes a state in which target tissues have decreased responsiveness to the actions of  
 435 insulin on glucose metabolism. It is associated with an increased risk of subsequent glucose intolerance  
 436 and diabetes (Barker 2005). In rats ACS lead to long-term impairment of glucose tolerance in the  
 437 offspring (Seckl 2001). Similarly, sheep exposed to repeat doses of betamethasone have altered insulin  
 438 secretion and increased hepatic glucose-6-phosphatase activity as adults; changes that are consistent with  
 439 impaired glucose tolerance in later life (Sloboda 2005).

440 In humans, prematurity itself causes insulin resistance and this effect is compounded by other factors such  
 441 as rapid early weight gain (Regan 2006). A single course of ACS has also been shown to increase this risk  
 442 in early adulthood (section 3.2.3). It is possible that repeat ACS may have an even greater effect on the  
 443 insulin-glucose axis.

### 444 3.4.6 Effect on Cortisol

445 Administration of corticosteroids results in transient down-regulation of the hypothalamic-pituitary-  
 446 adrenal (HPA) axis, due to negative feedback at the level of the hypothalamus and pituitary. The duration  
 447 of this suppression after postnatal dexamethasone in preterm babies is often several weeks, and may be  
 448 sufficiently severe to warrant cortisol supplementation in times of stress (Ford 1997; Ng 1997). In  
 449 experimental animals, the effects of ACS exposure are complex. Rats exposed *in utero* to dexamethasone  
 450 have evidence of long-term up-regulation of the HPA axis into adulthood, at least in part due to  
 451 permanent down-regulation of the hippocampal glucocorticoid receptors leading to resetting of the “set  
 452 point” of the negative feedback loop. Sheep exposed *in utero* to repeat doses of betamethasone have up-  
 453 regulation of the HPA axis at one year of age (early adulthood) (Sloboda 2002) but this wanes over time,  
 454 so that by 3 years (middle age) there is evidence of HPA axis suppression (Sloboda 2007).

455 The effect of ACS on HPA axis function in humans has not been well studied. In two small observational  
 456 studies of preterm infants, antenatal betamethasone reduced the cortisol response to a physiological  
 457 stressor at 1 week (Davis 2004; Davis 2006) and at four to six weeks of age (Davis 2006). Long-term  
 458 follow-up of subjects from the Auckland Steroid Trial did not show differences in fasting plasma cortisol  
 459 levels at age 30 years (Dalziel, Walker, 2005).

460 Data on the effect of repeat ACS on the HPA axis in humans are sparse. Studies in subgroups of babies  
 461 from ACTORDS found that repeat ACS were associated with a small temporary reduction in basal  
 462 salivary cortisol concentration in the first week after birth and decreased stress responses on day 3 of life  
 463 (section 3.3.2). However another study found no differences in plasma cortisol and ACTH or response to  
 464 metyrapone challenge at 2-3 days of age (Battin 2007). No other randomised data are available on the  
 465 effects of repeat ACS on HPA axis function in humans.

### 466 3.5 Summary

467 This study of early school-age outcomes in ACTORDS children is justified for the following reasons:

- 468 • Repeat doses of antenatal corticosteroids (ACS) provide clinically important respiratory and other  
 469 benefits for babies born preterm.
- 470 • There are no randomised data regarding the effects of repeat ACS beyond 2 years corrected age,  
 471 but other evidence from animal and human non-randomised studies show that repeat ACS may be  
 472 harmful in the long-term with regard to neurodevelopment, growth, and cardiovascular and  
 473 metabolic disease.
- 474 • These possible effects of repeat ACS cannot be fully evaluated before school age and long-term  
 475 follow is essential to assess overall safety.
- 476 • ACTORDS is currently the largest published randomised trial of repeat ACS and the only trial  
 477 planning school-age follow-up.
- 478 • The results of this study will directly influence clinical practice and potentially improve outcomes  
 479 for preterm babies.
- 480 • The additional physiological studies to be performed in the New Zealand subgroup will provide  
 481 important direct human experimental data regarding the glucocorticoid hypothesis for the  
 482 developmental origins of adult disease.

## 483 4 RESEARCH PLAN

### 484 4.1 Design

485 This is a follow-up study from a randomised placebo controlled trial. Children will be assessed without  
 486 reference to any previous results and study personnel will be blinded to treatment group. All ages will be  
 487 corrected for gestation at birth as even at 8 years correction for prematurity results in elimination of a  
 488 small but potentially important bias in cognitive test scores (Rickards 1989).

### 489 4.2 Subjects

490 All surviving children from the ACTORDS trial alive at 6-8 years corrected who reside in New Zealand  
 491 will be eligible and will be invited to participate in this study. There will be no exclusion criteria.

492 Women were eligible for the ACTORDS trial if they had a singleton, twin or triplet pregnancy at less than  
 493 32 weeks gestation, 7 or more days after an initial course of ACS, and had no contraindications to the use  
 494 of further corticosteroids (section 3.3.2).

495 The initial consent for the ACTORDS trial included follow-up to 2-years corrected age. New consent will  
 496 be sought for this study. It has received ethical approval from the Multi-Regional Ethics Committee of  
 497 New Zealand (MEC/07/07/101).

498 In the New Zealand subgroup 342 infants survived to discharge from hospital and at 2 years corrected age  
 499 337 were known to still reside in New Zealand. The ACTORDS study group, based in Adelaide, has had  
 500 ongoing contact with these families since the 2-year follow-up and has maintained a central database.  
 501 Currently there are 307 New Zealand children on the database with 153 in Auckland, 94 elsewhere in the  
 502 North Island and 60 in the South Island. The children are currently aged between 3 to 8 years. Families  
 503 will be contacted when the child is between 6 to 8 years corrected age and invited to join the study.  
 504 Assessments will begin in early 2008 and continue until the end of 2010 when the youngest children turn  
 505 6 years.

### 506 4.3 Primary Outcome

507 The primary outcome will be survival free of sensorineural disability. This will include: cerebral palsy,  
 508 hearing impairment requiring a hearing aid, blindness or IQ less than 1 SD below the mean.

509 Cerebral palsy (CP) will be defined as a non-progressive loss of motor function with disordered tone or  
 510 tendon reflexes. The presence of mild upper motor neuron signs in the absence of functional limitation  
 511 will not be diagnosed as CP. CP will be classified by type and limb distribution (Cans 2007) and graded  
 512 into three levels of severity based on gross motor function:

- 513 • Mild CP: ambulant with little limitation
- 514 • Moderate CP: ambulant with substantial limitation
- 515 • Severe CP: non-ambulant.

516 Gross motor function will also be classification according to the system of Palisano (1997).

517 Blindness will be defined as visual acuity less than 6/60 in the best eye after best possible correction.

518 The level of neurosensory disability will be further classified as follows:

- 519 • Severe disability: any of severe cerebral palsy, IQ less than -3 SD below the mean, or blindness
- 520 • Moderate disability: any of moderate cerebral palsy, deafness, or IQ from -3 SD to -2 SD below the  
 521 mean
- 522 • Mild disability: mild cerebral palsy or IQ from -2 SD to -1 SD below the mean

#### 523 4.4 Secondary Outcomes

##### 524 Paediatric

- 525 • Mortality
- 526 • Growth: height, weight, head circumference, mid arm circumference (non-dominant), upper: lower  
 527 segment ratio
- 528 • Sensorineural impairment including blindness, deafness and cerebral palsy as defined above
- 529 • Movement ABC-2 score
- 530 • Blood pressure as measured by an oscillometric device: systolic, diastolic and mean arterial pressure  
 531 and proportion in the hypertensive range ( $\geq 95^{\text{th}}$  percentile or 1.65 SD)
- 532 • Lung function as measured by flow spirometry: FVC, FEV1, FEV1/FVC ratio, PEF, FEF25-75,  
 533 FEF50, FEF25 as % predicted for age, gender, and height
- 534 • Health related quality of life: parents will complete the Child Health Questionnaire (CHQ) and the  
 535 Multi-attribute Health Status (MAHS) questionnaire
- 536 • Chronic illness, health services utilisation, and reasons for use

##### 537 Psychometric

- 538 • General cognitive ability as assessed by the Weschler Abbreviated Scale of Intelligence (WASI)
- 539 • Attention & executive function as assessed by subtests from the Test of Everyday Attention for  
 540 Children (TEAch), the Rey Complex Figure (RCF), the Fruit Stroop task. Parents and teachers will  
 541 complete the Behavior Rating Inventory of Executive Function (BRIEF).
- 542 • Memory & learning as assessed by the Rey Auditory Verbal Learning Test (RAVLT)
- 543 • Visual perceptual skills as assessed by subtests of the Test of Visual-Perceptual Skills 3<sup>rd</sup> edition  
 544 (TVPS-3)
- 545 • Academic achievement as assessed by the Wide Range of Achievement Test (WRAT4)
- 546 • Behaviour problems: parents and teachers will complete the Strength and Difficulties Questionnaire  
 547 (SDQ), and the Conner's ADHD/DSMIV Scales (CADS)

##### 548 Physiological

- 549 • Oscillatory ambulatory blood pressure (ABP) monitoring, 24 hour recording:
  - 550 □ 24-hour, daytime, and nighttime mean ABPM parameters (systolic and diastolic BP,  
 551 mean arterial BP, heart rate) and Z-scores (gender and height specific)
  - 552 □ Blood pressure load and nocturnal dipping
- 553 • Frequently sampled IV glucose tolerance test (FSIGTT) with minimal model analysis (MINMOD):
  - 554 □ Insulin sensitivity index ( $S_I$ )
  - 555 □ Acute insulin response
  - 556 □ Glucose effectiveness ( $S_g$ )
  - 557 □ Glucose disappearance coefficient ( $K_g$ )
- 558 • Whole body dual energy x-ray absorptiometry (DEXA):
  - 559 □ Bone area (BA), bone mineral content (BMC), areal bone mineral density (aBMD)
  - 560 □ BA for height and BMC for BA and height Z-scores (gender specific)

- 561           □ Fat mass (FM) and lean mass (LM), FM percentage, FM index (FM/height)
- 562 • Hypothalamic-Pituitary-Adrenal (HPA) axis function:
- 563           □ Basal diurnal salivary cortisol and dehydroepiandrosterone (DHEA)
- 564           □ Fasting & stress plasma cortisol with FSIGTT
- 565 • Renal function
- 566           □ Creatinine
- 567           □ Estimated creatinine clearance (CrCL, ml/min/1.73m<sup>2</sup>)

#### 568 4.5 Data management and analyses

##### 569 Statistical analysis

570 Data will be entered into a database and analysed using SAS statistics software with the assistance of the  
 571 ACTORDS study statistician. Dichotomous outcome data will be contrasted by  $\chi^2$  analysis or log-  
 572 binomial regressions to adjust for confounding variables, and continuous data by t-test or analysis of  
 573 variance (ANOVA) to adjust for confounding variables. Confounding variables will comprise  
 574 sociodemographic variables, such as ethnicity, language spoken at home, family structure, mother's  
 575 marital status, social class, and mother's and father's education, as well as gender. Adjustment will also  
 576 be necessary to allow for a small design effect caused by non-independence of children from multiple  
 577 pregnancies. P-values <0.05 will be considered statistically significant.

##### 578 Power and Clinical Significance

579 The best estimate of the primary outcome is 87% survival free of neurosensory disability. This is based  
 580 on data from the 2-year ACTORDS follow-up. Assuming 90% follow-up and a 2-sided significance level  
 581 of 5%, the New Zealand subgroup (values for the total Australasian ACTORDS study cohort in brackets)  
 582 will have 80% power to detect differences in the primary outcome from 87% up to 96% or down to 75%  
 583 (92% to 80%); differences in cerebral palsy from 4% up to 12% or down to 0% (8% to 1%); and for  
 584 outcome variables that are continuous and normally distributed (measures of growth, blood pressure,  
 585 psychological tests), differences as small as 0.34SD (0.18SD). In the case of DEXA, if 200 children are  
 586 scanned, the study will have 80% power to detect differences of 0.4SD, assuming DEXA parameters are  
 587 normally distributed. The power of the study to detect larger differences would, of course, be higher.

588 For lung function the total Australasian cohort will be able to detect differences between groups of 3 to  
 589 4% for values of FVC and FEV<sub>1</sub> (Dalziel, Rea, 2006).

590 For insulin sensitivity, based on data in normal children of this age, the study will have 80% power to  
 591 detect a 10% difference if 50% of children agree to this test and a 20% difference if only 25% agree.

592 These minimum absolute differences are considered clinically important to detect. For IQ, 0.3 SD  
 593 represents a 5-point difference in IQ. A 0.3 SD decrease in head circumference in childhood is associated  
 594 with a 0.7 reduction of IQ points (Gale 2004). For BMI, a 0.3 SD increase in childhood is associated with  
 595 an 8% increase in the hazard ratio for death from coronary heart disease (Eriksson 1999). For insulin  
 596 resistance, the risk of developing type 2 diabetes is reported to be 46% over 25 years in a high-risk  
 597 population (Martin 1992).

#### 598 4.6 Structure of assessments

599 Wherever possible, in order to maximise participation rates, all assessments will occur on the same day.  
 600 The exceptions will occur when DEXA is not available on the assessment site, necessitating a separate  
 601 appointment, ambulatory blood pressure measurement, which will occur overnight after the other  
 602 assessments, and salivary cortisol, which will be collected over 3 typical days.

603 Children agreeing to the glucose tolerance test will be asked to fast overnight, and this test will be done  
 604 first in the early morning. The remaining physical assessments and DEXA will then be completed after  
 605 the child has had a break and breakfast. A longer lunchtime break will then be followed by the  
 606 psychological assessments. Children not consenting to blood tests will not be fasted and will start the  
 607 assessment later in the morning, but follow the same sequence. The entire glucose tolerance test,  
 608 including setting up, takes approximately 2h, during which the child watches a movie of their choice.  
 609 DEXA scanning takes <5 minutes. Physical assessment with the paediatrician, including blood pressure  
 610 and lung function, takes approximately 1 hour. The psychological assessment will take 2.5 to 3 hours, and  
 611 at least one break will be provided.

612

613 **APPENDIX 1: PAEDIATRIC ASSESSMENT**614 ***Growth***

615 Height and sitting height will be measured by a stadiometer to the nearest 0.1cm (bare feet), weight by  
 616 electronic scales to the nearest 0.1kg (minimal clothing) and head circumference and mid-arm  
 617 circumference (non dominant arm at the half-way point between the acromion to olecranon) by tape  
 618 measure to the nearest 0.1cm. Values will be computed, using corrected age, for the relevant percentile,  
 619 percent of median, and standard deviation scores from the British Growth Reference (Cole 1995; Cole  
 620 1998; Freeman 1995).

621 ***Blood pressure***

622 Blood pressure (BP) will be recorded in the right arm with the subject seated in a chair after a 10-minute  
 623 rest using a Dinamap automated oscillometric device. Three measurements will be made and the average  
 624 systolic, diastolic and mean arterial pressure will be converted to Z-scores (age, height and gender  
 625 specific) (Rosner 1993). If the child is hypertensive (>95<sup>th</sup> percentile, or approximately >110/75mmHg at  
 626 6-8 years) a second set of measurements will be taken later in the assessment. American Heart  
 627 Association guidelines for the correct measurement of blood pressure and selection of cuff size will be  
 628 followed (Pickering 2005). As a rule of thumb the cuff width should be approximately 75% of arm length  
 629 (acromion to olecranon distance).

630 ***Lung function***

631 Ventilatory capacity will be measured by spirometry using the EasyOne 2001 flow spirometer (NDD  
 632 Technologies), which conforms to both American Thoracic Society (ATS) and European Thoracic  
 633 Society (ERS) diagnostic spirometry standards. The following parameters will be assessed using forced  
 634 expiration: forced vital capacity (FVC), forced expiratory volume in 1 second (FEV<sub>1</sub>), peak expiratory  
 635 flow (PEF), flow rate at 50% and 25% vital capacity (FEF<sub>50</sub>, FEF<sub>25</sub>), mean flow between 25-75% of vital  
 636 capacity (FEF<sub>25-75%</sub>). ATS 1994 spirometry guidelines will be observed (American Thoracic Society  
 637 1995), which defines a satisfactory test as 3 technically acceptable trials including 2 reproducible trials  
 638 (<0.2L variation in the 2 largest FVC and FEV1 measures). Therefore, a minimum of three forced  
 639 expiratory manoeuvres will be performed.

640 The largest FVC and FEV1 from all acceptable trials will be recorded, even if they do not come from the  
 641 same trial, as recommended by the ATS. Other measures will be obtained from the best trial (largest sum  
 642 of FVC and FEV1) that meets acceptability criteria. Results will be expressed as percent predicted for  
 643 gender, age and height for healthy, normal birth weight, Caucasian Australian children (Hibbert 1989).  
 644 The use of an exponential regression form (see appendix 6.4) has ensured that percent predicted is  
 645 independent of height for each of the lung function parameters. Raw data will not be corrected for  
 646 ethnicity but later adjustment may be required if ethnic composition differs markedly between study  
 647 groups.

648 The EasyOne spirometer has been shown to have very stable calibration in clinical use and to not require  
 649 regular volume calibration (Pe'rez-Padilla 2006; Walters 2006). However, a study investigator will serve  
 650 as a biological control to monitor spirometer performance on a regular basis. FVC or FEV1 values outside  
 651 a 95% confidence interval will indicate the need for volumetric calibration (Johns 2003 p21-22).

652 ***Neurosensory function***

653 Visual acuity will be measured using a 3m Snellen chart testing both binocular and monocular vision.  
 654 Corrective lenses will be worn and the child's eye will be occluded by patch or by the examiner. Visual  
 655 defects will be deemed 'severe disability' if felt to be subjectively so by the paediatrician but 'legally  
 656 blind' will be defined as visual acuity <6/60 in the best eye. Further assessment of vision will be advised  
 657 if fewer than 4 of 6 correct letters are read on the 6/9 line or if there is a 2-line difference between the  
 658 eyes, as recommended by the American Academy of Pediatrics (2003).

659 Otoscopy will be performed and hearing will be screened using low and high tone whispered numbers.  
 660 Children will be referred for audiology if they are considered to have language delay or if deafness is  
 661 suspected. Deafness is defined as hearing impairment requiring hearing aids.

662 Cerebral palsy, defined as a non-progressive loss of motor function with disordered tone or tendon  
 663 reflexes, will be determined by neurological examination and classified and graded as outlined above.

664 Motor function will also be assessed using the second edition of the Movement Assessment Battery for  
665 Children (Movement ABC-2) (Henderson 2007). Children born preterm are at increased risk of motor  
666 difficulties, even in the absence of signs of neurological impairment. The Movement ABC is a sensitive  
667 test of motor dysfunction in this group (Jongmans 1998). Age adjusted percentiles and Z scores will be  
668 determined for the three test components (manual dexterity, aiming and catching, and balance) and the  
669 total test using the reference tables in the ABC-2 manual. The ABC-2 has been standardized in a large  
670 sample of representative British children. Scores below the 15<sup>th</sup> percentile indicate motor impairment and  
671 those below the 5<sup>th</sup> percentile are associated with severe motor coordination problems.

672 ***Pubertal Status***

673 The onset of puberty will be determined by breast development in girls and testicular volume via an  
674 orchidometer in boys (>4ml or more). Pubertal progression will be classified by Tanner stage (Marshall  
675 1969; Marshall 1970).

676 ***General health***

677 A paediatrician will formally assess all children by general history and physical examination to determine  
678 the presence of any significant chronic illness. Data regarding hospital readmissions will be confirmed,  
679 where necessary. The child's caregiver will be asked to complete a questionnaire relating to any  
680 respiratory morbidity, history of illness or injury and health service utilization.

681 ***Health-related quality of life***

682 Health-related quality of life will be measured using a paediatric adaptation of a multi-attribute health  
683 status (MAHS) classification system (Saigal 1994). The MAHS classification system derives from the  
684 oncology literature and describes both the type and severity of functional limitations according to seven  
685 attributes: sensation, mobility, emotion, cognition, self-care, pain, and fertility. Each attribute has four or  
686 five levels of function. The MAHS clearly assesses outcomes other than neurological function.

687 Children will also be assessed with the Australian Authorised Adaptation of the Child Health  
688 Questionnaire (CHQ) (Waters 2000). The CHQ has recently been standardised on over 5000 Australian  
689 children aged 5-18 years and provides an assessment of a child's psychosocial health, physical health and  
690 well-being.

691



692 **APPENDIX 2: PSYCHOLOGY ASSESSMENT**693 ***General cognitive ability***

694 Children will be assessed using the Wechsler (1999) Abbreviated Scale of Intelligence (WASI). An  
 695 estimated IQ score reflecting general intellectual ability, will be derived from four subtests: Vocabulary,  
 696 Similarities, Block Design, and Matrix Reasoning. Each scale/index is age standardised. Intellectual  
 697 impairment will be classified as follows:

- 698 • Mild intellectual impairment will be an IQ between 70 – 84 (from –2 SD to < –1 SD)
- 699 • Moderate intellectual impairment will be an IQ between 55 – 69 (–3 SD to < –2 SD)
- 700 • Severe intellectual impairment will be an IQ below 55 (< –3 SD).

701 ***Attention & Executive Function***

702 Preterm children are at increased risk of attention difficulties and executive dysfunction. Both are  
 703 associated with diffuse white matter injury, which is the predominant form of brain injury in this  
 704 population. Attention and executive function will be assessed using the following age standardised tests:

- 705 • Subtests from the Test of Everyday Attention for Children (TEACh) (Manly 1999) including Sky  
 706 Search (selective attention), Score (sustained attention), Sky Search Dual Task (divided attention) and  
 707 Creature Counting (shifting attention)
- 708 • The Rey Complex Figure (Rey 1993), which assesses spatial organisation and strategic decision-  
 709 making
- 710 • The Fruit Stroop task (Archibald 1999), which assesses impulse control

711  
 712 In addition, parents and teachers will complete the Behavior Rating Inventory of Executive Function  
 713 (BRIEF) (Gioia 2000), a questionnaire that assesses behavioural manifestations of inattention and  
 714 executive function. The BRIEF provides eight theoretically and empirically derived clinical scales  
 715 (Inhibit, Shift, Emotional Control, Initiate, Working Memory, Plan/Organize, Organization of Materials,  
 716 Monitor) and scores are age and gender standardised. Internal consistency for the parent form of the  
 717 BRIEF has been found to be high, ranging from 0.80 to 0.98 (Gioia 2000). Clinical validity has been  
 718 supported with a variety of diagnostic groups.

719 ***Memory and Learning***

720 The Rey Auditory Verbal Learning Test (RAVLT) (Rey 1964) will be administered to give multiple  
 721 measures of verbal memory and learning, including proactive inhibition, retention, encoding versus  
 722 retrieval, and subjective organization.

723 ***Visual-Perceptual Skills***

724 Three subtests of the Test of Visual-Perceptual Skills, 3<sup>rd</sup> edition (TVPS-3), will be administered (Visual-  
 725 spatial relations, Visual figure ground, and Visual closure) to assess visual-perceptual skills (Martin  
 726 2006).

727 ***Educational Progress***

728 Educational progress will be assessed using the Wide Range Achievement Test (WRAT4) (Wilkinson  
 729 2005). Three subtests will be administered: word reading, spelling, and arithmetic. Scale scores from 70-  
 730 84 will define mild impairment in these educational domains, while scale scores <70 will define major  
 731 impairment.

732 ***Behavioural Problems***

733 Children born preterm are at increased risk of attention-deficit hyperactivity disorder (ADHD). This will  
 734 be assessed using a specific ADHD diagnostic questionnaire, namely, the Conners' (2000) ADHD/DSM-  
 735 IV Scales (CADS). In addition, parent and teacher versions of the Strength & Difficulties Questionnaire  
 736 (SDQ) will be administered (Goodman 1997). The SDQ is a well-validated questionnaire that assesses  
 737 overall behaviour problems, emotional symptoms, hyperactivity/inattention, peer relationship problems,  
 738 and prosocial behaviour.

739

740 **APPENDIX 3: PHYSIOLOGICAL STUDIES**741 ***Ambulatory Blood pressure***

742 Ambulatory blood pressure monitoring (ABPM) provides important information on circadian rhythm and  
 743 blood pressure load. It also avoids the phenomenon of ‘white coat hypertension’, which is a common  
 744 problem in children. ABPM is more sensitive for the detection of early hypertension and has greater  
 745 predictive value for cardiovascular disease than casual BP measurement (O'Brien 2003). ABPM has been  
 746 used successfully in large numbers of children and is generally well tolerated.

747 ABPM will be performed using the Spacelabs 90217 monitor and accompanying software. The cuff will  
 748 be fitted to the non-dominant arm and cuff size will be selected according to the mid-arm circumference.  
 749 Children will be asked to wear the monitor for a 24-hour period but remove it for washing or vigorous  
 750 activity. One ABPM recording will be taken in the clinic on the day of assessment. The ABPM will be  
 751 programmed to inflate every half hour from 07:00 to 24:00 and hourly from 24:00 to 07:00. Sleep and  
 752 wake times will be recorded. A minimum of 14 daytime and 7 nighttime measurements will be required  
 753 for acceptability (O'Brien 2000).

754 Reference ranges for casual blood pressure measurements are inappropriate for the interpretation of  
 755 ABPM data (Diaz 2007). Therefore, ABPM results will be compared to a Central European reference  
 756 population (Soergel 1997), which is the largest study of ABPM in healthy children and was also  
 757 performed using Spacelabs monitors. This data has been updated using the LMS method for reference  
 758 centile calculation (Cole 1992) to account for a non-Gaussian distribution (Wuhl 2002). LMS values will  
 759 be determined from reference tables by linear interpolation for height and will be used to calculate ABPM  
 760 parameter Z scores (systolic, diastolic and mean arterial pressure and heart rate). Blood pressure load will  
 761 be determined for the 95<sup>th</sup> and 90<sup>th</sup> reference percentiles (Wuhl 2002). A normal nocturnal dip will be  
 762 defined as a fall in mean daytime blood pressure of 10% or more during sleep.

763 ***Glucose Homeostasis***

764 Children who assent to blood sampling will undergo a frequently sampled intravenous glucose tolerance  
 765 test (FSIVGTT) using the shortened (90 minutes) method for children (Cutfield 1990) with insulin  
 766 modification (Saad, Steil, Kades, 1997; Saad, Steil, Riad-Gabriel, 1997). This requires an overnight fast  
 767 and insertion of a single intravenous cannula after application of local anaesthetic cream (EMLA).  
 768 Heparinised saline will be dripped through the cannula to ensure patency and allow frequent blood  
 769 sampling for insulin and glucose. This test has been successfully performed at the Liggins Institute in  
 770 large numbers of children as young as 4 years of age, without apparent distress or adverse effect. The test  
 771 will be abandoned if intravenous access is difficult or the child has persisting symptomatic hypoglycemia  
 772 after the insulin bolus, although this is uncommon.

773 Glucose will be measured using a Hitachi autoanalyser and insulin will be measured using the IMX  
 774 Abbott immunoassay, both of which are available at the Liggins Institute.

775 Glucose and insulin dynamics will be analysed via the Bergman minimal model using MINMOD  
 776 Millennium (v.6) software (Boston 2003). This method is well validated and highly correlated with clamp  
 777 techniques (Bergman 2005; Cutfield 1990; Saad, Steil, Kades, 1997). MINMOD assesses four different  
 778 parameters:

- 779 • Insulin sensitivity index ( $S_1$ ), which is the ability of insulin to accelerate net glucose disposal.
- 780 • Acute insulin response, which is the insulin released in the first 10 minutes after the glucose bolus.
- 781 • Glucose effectiveness ( $S_g$ ), which is the ability of glucose to enhance its own disposal and suppress  
 782 its production at basal insulin levels.
- 783 • Glucose disappearance coefficient ( $K_g$ ), which is calculated from the slope of the natural log of  
 784 glucose concentration between 10 and 19 minutes.

785 ***Bone Mass & Body Composition***

786 Childhood and adolescence are critical periods for bone mineral accrual and achievement of optimal early  
 787 bone mass is an important factor in preventing osteoporosis in adulthood (Horlick 2004; Specker 2005).  
 788 Dual energy x-ray absorptiometry (DEXA) will be used to measure total body bone mass, also termed  
 789 bone mineral content (BMC). DEXA is the most widely used densitometry technique in children (Gilsanz  
 790 1998; Kalkwarf 2007; Ward 2007) and whole body scans are preferred because of their greater precision  
 791 compared to regional studies (Margulies 2005). Whole body scans are quick to perform in children

792 (usually less than 5 minutes) and the radiation dose is low and generally regarded as trivial (Njeh 1999;  
793 Sanchez 2005). Cortical bone composes 80% of the total skeletal mass, therefore, whole body DEXA  
794 reflects predominantly cortical bone mass and dimensions (Leonard 2004).

795 BMC (g) depends on both the size and density of bones. However, DEXA cannot determine true bone  
796 density as it measures only cross sectional bone area (BA, cm<sup>2</sup>) and not bone volume. The increase in  
797 BMC that occurs throughout childhood is due mainly to changes in bone size as true volumetric bone  
798 density (vBMD, g/cm<sup>3</sup>), as measured by quantitative computed tomography (QCT), is relatively constant  
799 until puberty (Specker 2005). Interpretation of paediatric DEXA is complicated by the fact that large  
800 differences can occur in body and bone size within and across different ages. Therefore, BMC values  
801 must be adjusted for size but the BMC/BA index, also known as the areal bone mineral density (aBMD,  
802 g/cm<sup>2</sup>), provides only a crude adjustment with larger bones having an artificially inflated aBMD for a  
803 given vBMD (Specker 2005). Therefore, total body BMC (TBBMC) should be interpreted in relation to  
804 body size as well as BA (Horlick 2004; Molgaard 1997; Prentice 1994). Gender, ethnicity and pubertal  
805 status are also important factors affecting BMC, although pubertal status adds little to prediction of  
806 TBBMC if adjustment is made for other variables including body size (Horlick 2004). When compared to  
807 QCT, TBBMC-for-height provides a better estimate of bone strength than TBBMC-for-BA and TBBA-  
808 for-height is the best index of bone dimension (Leonard 2004).

809 Whole body DEXA will also be used to measure body composition including total body fat mass (TBFM,  
810 g), lean mass (TBLM, g), fat percentage (FM%), fat distribution (android: gynoid ratio), and fat mass  
811 index (FM/ height). DEXA body composition measurements show a close relationship to those obtained  
812 by the four-compartment method, although small differences in FM% occur with body size and between  
813 manufacturers (Sopher 2004).

814 DEXA results differ between manufacturer and machine. Therefore, a single type of machine will be  
815 used, the Lunar Prodigy, which is available at the Liggins (Encore v 8.1) and St George's Radiology in  
816 Christchurch (Encore v8.8). Both facilities have the paediatric software module.

### 817 **Cortisol**

818 Salivary cortisol measurements are widely used in paediatric research to assess hypopituitarism-pituitary-  
819 adrenal (HPA) axis function (Hanrahan 2006; Jessop 2007). They allow for determination of basal  
820 cortisol levels in a stress-free manner in the home environment but can also be used to assess stress  
821 responses as salivary cortisol levels peak within minutes of a plasma cortisol surge (Levine 2007; Vining  
822 1983). Saliva and plasma cortisol concentrations are highly correlated (Aardal 1995; Gallagher 2006; Poll  
823 2007; Vining 1983; Woodside 1991), especially when salivary cortisol is related to the unbound plasma  
824 cortisol fraction (Kirschbaum 1989). Salivary cortisol concentrations are approximately 70% that of  
825 unbound plasma cortisol (Rosmalen 2005) and are unaffected by salivary flow rate (Kirschbaum 1989).

826 Basal cortisol concentrations will be determined from saliva collected at home on days representing  
827 normal activity, such as a school day. Morning fasting samples will be compared to early evening ones  
828 (5pm) to allow assessment of the diurnal pattern. Children will be instructed to collect the morning  
829 sample as soon as possible after waking. Because of day-to-day variations in cortisol secretion, samples  
830 will be collected over 3 days and averaged. The caregiver will record the time of waking and sample  
831 collection. Saliva samples will not be collected within half an hour of eating or brushing teeth.

832 Saliva will be collected by passive drool into Salivette tubes and children will be asked to collect a  
833 minimum of 1ml per sample. Cotton swabs will not be used as we have shown that they achieve variable  
834 cortisol recovery (unpublished data), a finding that has also been confirmed by other laboratories (Groschl  
835 2006; Strazdins 2005). Caregivers will be instructed to freeze the Salivettes immediately after collection.  
836 Once all 6 tubes have been collected they will be posted back to the study centre and then stored at -20°C.  
837 We have confirmed that cortisol is stable in saliva at room temperature for up to 5 days and that cortisol  
838 concentrations are unaffected by 2 freeze-thaw cycles (unpublished data). This has also been shown in  
839 other studies (Aardal 1995; Clements 1998; Groschl 2001).

840 Cortisol will be assayed by mass spectrometry using a technique that has been well validated in our  
841 laboratory. Mass spectrometry has the advantage of allowing simultaneous measurement of other  
842 hormones and we will also assay dehydroepiandrosterone (DHEA) to allow calculation of the cortisol /  
843 DHEA ratio. Abnormal cortisol / DHEA ratios have been shown to have clinical predictive value for  
844 psychopathology (Goodyer 2001).

845 In the subgroup of children who agree to undergo a FSIVGTT, we will measure plasma cortisol  
846 concentrations at baseline (fasting) and also following the insulin bolus, which may provide further  
847 information about HPA axis function in relation to physiological stress.

848 **Renal Function**

849 Plasma creatinine will be measured in the baseline blood of those children undergoing FSIVGTT via the  
850 Liggins Hitachi autoanalyser. Creatinine clearance (ml/min/1.73m<sup>2</sup>) will be estimated from height using  
851 the Schwartz (1976) equation:

852 
$$eGFR = kL/Scr \text{ (ml/min/1.73m}^2\text{)}$$

853 L = height in cm. Scr = creatinine concentration in mg/dl. The value of k is 0.47 for children when using  
854 the creatinase method of modern autoanalysers (Schwartz 2007). eGFR shows good correlation with  
855 creatinine clearance (r=0.935) (Schwartz 1976).

856

857 **REFERENCES**

- 858 Connors' Rating Scales-Revised Technical Manual. North Tonawanda, New York: Multi Health Systems; 2000.
- 859 Aardal E, Holm AC. Cortisol in saliva--reference ranges and relation to cortisol in serum. *Eur J Clin Chem Clin*  
860 *Biochem.* 1995;33(12):927-32.
- 861 Abbasi S, Hirsch D, Davis J, Tolosa J, Stouffer N, Debbs R, *et al.* Effect of single versus multiple courses of  
862 antenatal corticosteroids on maternal and neonatal outcome. *Am J Obstet Gynecol.* 2000;182(5):1243-9.
- 863 Aghajafari F, Murphy K, Matthews S, Ohlsson A, Amankwah K, Hannah M. Repeated doses of antenatal  
864 corticosteroids in animals: a systematic review. *Am J Obstet Gynecol.* 2002;186(4):843-9.
- 865 Aghajafari F, Murphy K, Ohlsson A, Amankwah K, Matthews S, Hannah ME. Multiple versus single courses of  
866 antenatal corticosteroids for preterm birth: a pilot study. *J Obstet Gynaecol Can.* 2002;24(4):321-9.
- 867 American Academy of Pediatrics. Eye examination in infants, children, and young adults by pediatricians.  
868 *Pediatrics.* 2003;111(4 Pt 1):902-7.
- 869 American Thoracic Society. Standardization of Spirometry, 1994 Update. *Am J Respir Crit Care Med.*  
870 1995;152(3):1107-36.
- 871 Anand D, Stevenson CJ, West CR, Pharoah POD. Lung function and respiratory health in adolescents of very low  
872 birth weight. *Arch Dis Child.* 2003;88(2):135-8.
- 873 Archibald S, Kerns K. Identification and description of new tests of executive functioning in children. *Child*  
874 *Neuropsych.* 1999;5(2):115-29.
- 875 Ashwood PJ, Crowther CA, Willson KJ, Haslam RR, Kennaway DJ, Hiller JE, *et al.* Neonatal adrenal function after  
876 repeat dose prenatal corticosteroids: a randomized controlled trial. *Am J Obstet Gynecol.* 2006;194(3):861-7.
- 877 Banks BA, Cnaan A, Morgan MA, Parer JT, Merrill JD, Ballard PL, *et al.* Multiple courses of antenatal  
878 corticosteroids and outcome of premature neonates. North American Thyrotropin-Releasing Hormone Study  
879 Group. *Am J Obstet Gynecol.* 1999;181(3):709-17.
- 880 Barker DJP. The developmental origins of insulin resistance. *Horm Res.* 2005;64 Suppl 3:2-7.
- 881 Barker DJP, Bagby SP, Hanson MA. Mechanisms of disease: in utero programming in the pathogenesis of  
882 hypertension. *Nat Clin Pract Nephrol.* 2006;2(12):700-7.
- 883 Battin MR, Bevan C, Harding JE. Repeat doses of antenatal steroids and hypothalamic-pituitary-adrenal axis (HPA)  
884 function. *Am J Obstet Gynecol.* 2007;197(1):40.e1-6.
- 885 Bergman RN. Minimal model: perspective from 2005. *Horm Res.* 2005;64 Suppl 3:8-15.
- 886 Boggess KA, Bailit JL, Singer ME, Parisi VM, Mercer BM. Projected benefits of universal or scheduled antepartum  
887 corticosteroids to prevent neonatal morbidity: a decision analysis. *Am J Obstet Gynecol.* 2005;193(4):1415-  
888 23.
- 889 Boston RC, Stefanovski D, Moate PJ, Sumner AE, Watanabe RM, Bergman RN. MINMOD Millennium: a  
890 computer program to calculate glucose effectiveness and insulin sensitivity from the frequently sampled  
891 intravenous glucose tolerance test. *Diabetes Technol Ther.* 2003;5(6):1003-15.
- 892 Brocklehurst P, Gates S, McKenzie-McHarg K, Alfirovic Z, Chamberlain G. Are we prescribing multiple courses of  
893 antenatal corticosteroids? A survey of practice in the UK. *Br J Obstet Gynaecol.* 1999;106(9):977-9.
- 894 Callaghan W, MacDorman M, Rasmussen S, Qin C, Lackritz E. The Contribution of Preterm Birth to Infant  
895 Mortality Rates in the United States. *Pediatrics.* 2006;118(4):1566-73.
- 896 Cans C, Dolk H, Platt MJ, Colver A, Prasauskiene A, Krageloh-Mann I, *et al.* Recommendations from the SCPE  
897 collaborative group for defining and classifying cerebral palsy. *Dev Med Child Neurol (Suppl).* 2007;109:35-  
898 8.

- 899 Cleasby ME, Kelly PAT, Walker BR, Seckl JR. Programming of rat muscle and fat metabolism by in utero  
900 overexposure to glucocorticoids. *Endocrinology*. 2003;144(3):999-1007.
- 901 Clements AD, Parker CR. The relationship between salivary cortisol concentrations in frozen versus mailed  
902 samples. *Psychoneuroendocrinology*. 1998;23(6):613-6.
- 903 Cole TJ, Green PJ. Smoothing reference centile curves: the LMS method and penalized likelihood. *Stat Med*.  
904 1992;11(10):1305-19.
- 905 Cole TJ, Freeman JV, Preece MA. Body mass index reference curves for the UK, 1990. *Arch Dis Child*.  
906 1995;73(1):25-9.
- 907 Cole TJ, Freeman JV, Preece MA. British 1990 growth reference centiles for weight, height, body mass index and  
908 head circumference fitted by maximum penalized likelihood. *Stat Med*. 1998;17(4):407-29.
- 909 Cooper C, Fall C, Egger P, Hobbs R, Eastell R, Barker D. Growth in infancy and bone mass in later life. *Ann*  
910 *Rheum Dis*. 1997;56:17-21.
- 911 Craig E, Thompson J, Mitchell E. Socioeconomic status and preterm birth: New Zealand trends, 1980 to 1999. *Arch*  
912 *Dis Child Fetal Neonatal Ed*. 2002;86(3):F142-6.
- 913 Crowther CA, Haslam RR, Hiller JE, Doyle LW, Robinson JS. Neonatal respiratory distress syndrome after repeat  
914 exposure to antenatal corticosteroids: a randomised controlled trial. *Lancet*. 2006;367(9526):1913-9.
- 915 Crowther CA, Doyle LW, Haslam RR, Hiller JE, Harding JE, Robinson JS, *et al*. Outcomes at 2 years of age after  
916 repeat doses of antenatal corticosteroids. *N Engl J Med*. 2007;357(12):1179-89.
- 917 Crowther CA, McKinlay CJD, Middleton P, Harding JE. Repeat doses of prenatal corticosteroids for women at risk  
918 of preterm birth for improving neonatal health outcomes. *Cochrane Database Sys Rev*. 2011;Issue 6. Art. No.  
919 CD003935. DOI: 10.1002/14651858.CD003935.pub3.
- 920 Cutfield WS, Bergman RN, Menon RK, Sperling MA. The modified minimal model: application to measurement of  
921 insulin sensitivity in children. *J Clin Endocrinol Metab*. 1990;70(6):1644-50.
- 922 Dalziel SR, Liang A, Parag V, Rodgers A, Harding JE. Blood pressure at 6 years of age after prenatal exposure to  
923 betamethasone: follow-up results of a randomized, controlled trial. *Pediatrics*. 2004;114(3):e373-7.
- 924 Dalziel SR, Lim VK, Lambert A, McCarthy D, Parag V, Rodgers A, *et al*. Antenatal exposure to betamethasone:  
925 psychological functioning and health related quality of life 31 years after inclusion in randomised controlled  
926 trial. *BMJ*. 2005;331(7518):665.
- 927 Dalziel SR, Walker NK, Parag V, Mantell C, Rea HH, Rodgers A, *et al*. Cardiovascular risk factors after antenatal  
928 exposure to betamethasone: 30-year follow-up of a randomised controlled trial. *Lancet*.  
929 2005;365(9474):1856-62.
- 930 Dalziel SR, Fenwick S, Cundy T, Parag V, Beck TJ, Rodgers A, *et al*. Peak bone mass after exposure to antenatal  
931 betamethasone and prematurity: follow-up of a randomized controlled trial. *J Bone Miner Res*.  
932 2006;21(8):1175-86.
- 933 Dalziel SR, Rea HH, Walker NK, Parag V, Mantell C, Rodgers A, *et al*. Long term effects of antenatal  
934 betamethasone on lung function: 30 year follow up of a randomised controlled trial. *Thorax*. 2006;61(8):678-  
935 83.
- 936 Dalziel SR, Lim VK, Lambert A, McCarthy D, Parag V, Rodgers A, *et al*. Psychological functioning and health-  
937 related quality of life in adulthood after preterm birth. *Dev Med Child Neurol*. 2007;49(8):597-602.
- 938 Davis EP, Townsend EL, Gunnar MR, Georgieff MK, Guiang SF, Cifuentes RF, *et al*. Effects of prenatal  
939 betamethasone exposure on regulation of stress physiology in healthy premature infants.  
940 *Psychoneuroendocrinology*. 2004;29(8):1028-36.
- 941 Davis EP, Townsend EL, Gunnar MR, Guiang SF, Lussky RC, Cifuentes RF, *et al*. Antenatal betamethasone  
942 treatment has a persisting influence on infant HPA axis regulation. *J Perinatol*. 2006;26(3):147-53.

- 943 Dessens AB, Haas HS, Koppe JG. Twenty-year follow-up of antenatal corticosteroid treatment. *Pediatrics*.  
944 2000;105(6):E77.
- 945 Diaz LN, Garin EH. Comparison of ambulatory blood pressure and Task Force criteria to identify pediatric  
946 hypertension. *Pediatr Nephrol*. 2007;22(4):554-8.
- 947 Dodic M, May CN, Wintour EM, Coghlan JP. An early prenatal exposure to excess glucocorticoid leads to  
948 hypertensive offspring in sheep. *Clin Sci (Colch)*. 1998;94(2):149-55.
- 949 Doyle LW, Ford GW, Rickards AL, Kelly EA, Davis NM, Callanan C, *et al*. Antenatal corticosteroids and outcome  
950 at 14 years of age in children with birth weight less than 1501 grams. *Pediatrics*. 2000;106(1):E2.
- 951 Doyle LW, Faber B, Callanan C, Morley R. Blood pressure in late adolescence and very low birth weight.  
952 *Pediatrics*. 2003;111(2):252-7.
- 953 Doyle LW, Victorian Infant Collaborative Study G. Respiratory function at age 8-9 years in extremely low  
954 birthweight/very preterm children born in Victoria in 1991-1992. *Pediatr Pulmonol*. 2006;41(6):570-6.
- 955 Dunlop SA, Archer MA, Quinlivan JA, Beazley LD, Newnham JP. Repeated prenatal corticosteroids delay  
956 myelination in the ovine central nervous system. *J Matern Fetal Med*. 1997;6(6):309-13.
- 957 Edwards CR, Benediktsson R, Lindsay RS, Seckl JR. Dysfunction of placental glucocorticoid barrier: link between  
958 fetal environment and adult hypertension? *Lancet*. 1993;341(8841):355-7.
- 959 Elimian A, Verma U, Visintainer P, Tejani N. Effectiveness of multidose antenatal steroids. *Obstet Gynecol*.  
960 2000;95(1):34-6.
- 961 Eriksson JG, Forsen T, Tuomilehto J, Winter PD, Osmond C, Barker DJ. Catch-up growth in childhood and death  
962 from coronary heart disease: longitudinal study. *BMJ*. 1999;318(7181):427-31.
- 963 Esplin M, Fumsett M, Smith S. Multiple courses of antenatal steroids associated with a delay in long-term  
964 psychomotor development in children. *Am J Obstet Gynecol*. 2000;182:A27.
- 965 Fewtrell MS, Lucas A, Cole TJ, Wells JCK. Prematurity and reduced body fatness at 8-12 y of age. *Am J Clin Nutr*.  
966 2004;80(2):436-40.
- 967 Ford LR, Willi SM, Hollis BW, Wright NM. Suppression and recovery of the neonatal hypothalamic-pituitary-  
968 adrenal axis after prolonged dexamethasone therapy. *J Pediatr*. 1997;131(5):722-6.
- 969 Fowden AL, Szemere J, Hughes P, Gilmour RS, Forhead AJ. The effects of cortisol on the growth rate of the sheep  
970 fetus during late gestation. *J Endocrinol*. 1996;151(1):97-105.
- 971 Freeman J, Cole T, Chinn S, Jones P, White E, Preece M. Cross sectional stature and weight reference curves for the  
972 UK, 1990. *Arch Dis Child*. 1995;73:17-24.
- 973 French NP, Hagan R, Evans SF, Godfrey M, Newnham JP. Repeated antenatal corticosteroids: size at birth and  
974 subsequent development. *Am J Obstet Gynecol*. 1999;180(1 Pt 1):114-21.
- 975 French NP, Hagan R, Evans SF, Mullan A, Newnham JP. Repeated antenatal corticosteroids: effects on cerebral  
976 palsy and childhood behavior. *Am J Obstet Gynecol*. 2004;190(3):588-95.
- 977 Galdes-Sebaldo M, Sheller JR, Groggaard J, Stahlman M. Prematurity is associated with abnormal airway function in  
978 childhood. *Pediatr Pulmonol*. 1989;7(4):259-64.
- 979 Gale CR, O'Callaghan FJ, Godfrey KM, Law CM, Martyn CN. Critical periods of brain growth and cognitive  
980 function in children. *Brain*. 2004;127(Pt 2):321-9.
- 981 Gallagher P, Leitch MM, Massey AE, McAllister-Williams RH, Young AH. Assessing cortisol and  
982 dehydroepiandrosterone (DHEA) in saliva: effects of collection method. *J Psychopharmacol*.  
983 2006;20(5):643-9.

- 984 Gates S. Repeated antenatal steroid trial methodology. *Am J Obstet Gynecol.* 2007;197(4):437.
- 985 Gates S, Brocklehurst P. Decline in effectiveness of antenatal corticosteroids with time to birth: real or artefact?  
986 *BMJ.* 2007;335(7610):77-9.
- 987 Gilsanz V. Bone density in children: a review of the available techniques and indications. *Eur J Radiol.*  
988 1998;26(2):177-82.
- 989 Gioia G, Isquith P, Guy S, Kenworthy L. BRIEF: Behavior Rating Inventory of Executive Function. Professional  
990 Manual. Odessa, FL: Psychological Assessment Resources; 2000.
- 991 Gluckman PD, Cutfield W, Hofman P, Hanson MA. The fetal, neonatal, and infant environments--the long-term  
992 consequences for disease risk. *Early Hum Dev.* 2005;81(1):51-9.
- 993 Gluckman PD, Hanson MA, Morton SMB, Pinal CS. Life-long echoes--a critical analysis of the developmental  
994 origins of adult disease model. *Biol Neonate.* 2005;87(2):127-39.
- 995 Gluckman PD, Hanson MA, Beedle AS. Non-genomic transgenerational inheritance of disease risk. *Bioessays.*  
996 2007;29(2):145-54.
- 997 Godfrey K, Walker-Bone K, Robinson S, Taylor P, Shore S, Wheeler T, *et al.* Neonatal bone mass: influence of  
998 parental birthweight, maternal smoking, body composition, and activity during pregnancy. *J Bone Miner Res.*  
999 2001;16(9):1694-703.
- 1000 Godfrey KM, Lillycrop KA, Burdge GC, Gluckman PD, Hanson MA. Epigenetic mechanisms and the mismatch  
1001 concept of the developmental origins of health and disease. *Pediatr Res.* 2007;61(5 Pt 2):5R-10R.
- 1002 Goodman R. The Strengths and Difficulties Questionnaire. *J Child Psych Psychiat.* 1997;38:581-6.
- 1003 Goodyer IM, Park RJ, Netherton CM, Herbert J. Possible role of cortisol and dehydroepiandrosterone in human  
1004 development and psychopathology. *Br J Psychiatry.* 2001;179:243-9.
- 1005 Groschl M, Wagner R, Rauh M, Dorr H-G. Stability of salivary steroids: the influences of storage, food and dental  
1006 care. *Steroids.* 2001;66(10):737-41.
- 1007 Groschl M, Rauh M. Influence of commercial collection devices for saliva on the reliability of salivary steroids  
1008 analysis. *Steroids.* 2006;71(13-14):1097-100.
- 1009 Guinn DA, Atkinson MW, Sullivan L, Lee M, MacGregor S, Parilla BV, *et al.* Single vs weekly courses of antenatal  
1010 corticosteroids for women at risk of preterm delivery: a randomized controlled trial. *JAMA.*  
1011 2001;286(13):1581-7.
- 1012 Hack M, Fanaroff AA. Outcomes of children of extremely low birthweight and gestational age in the 1990's. *Early  
1013 Hum Dev.* 1999;53(3):193-218.
- 1014 Hanrahan K, McCarthy AM, Kleiber C, Lutgendorf S, Tsalikian E. Strategies for salivary cortisol collection and  
1015 analysis in research with children. *Appl Nurs Res.* 2006;19(2):95-101.
- 1016 Harding JE, Pang J, Knight DB, Liggins GC. Do antenatal corticosteroids help in the setting of preterm rupture of  
1017 membranes? *Am J Obstet Gynecol.* 2001;184(2):131-9.
- 1018 Hasbargen U, Reber D, Versmold H, Schulze A. Growth and development of children to 4 years of age after  
1019 repeated antenatal steroid administration. *Eur J Pediatr.* 2001;160(9):552-5.
- 1020 Henderson S, Sugden D, Barnett A. Movement assessment battery for children-2. London: Harcourt Assessment;  
1021 2007.
- 1022 Hibbert ME, Lannigan A, Landau LI, Phelan PD. Lung function values from a longitudinal study of healthy children  
1023 and adolescents. *Pediatr Pulmonol.* 1989;7(2):101-9.



- 1024 Hofman PL, Regan F, Jackson WE, Jefferies C, Knight DB, Robinson EM, *et al.* Premature birth and later insulin  
1025 resistance. *N Engl J Med.* 2004;351(21):2179-86.
- 1026 Horlick M, Wang J, Pierson RN, Jr., Thornton JC. Prediction models for evaluation of total-body bone mass with  
1027 dual-energy X-ray absorptiometry among children and adolescents. *Pediatrics.* 2004;114(3):e337-45.
- 1028 Huang WL, Beazley LD, Quinlivan JA, Evans SF, Newnham JP, Dunlop SA. Effect of corticosteroids on brain  
1029 growth in fetal sheep. *Obstet Gynecol.* 1999;94(2):213-8.
- 1030 Huang WL, Harper CG, Evans SF, Newnham JP, Dunlop SA. Repeated prenatal corticosteroid administration  
1031 delays myelination of the corpus callosum in fetal sheep. *Int J Dev Neurosci.* 2001;19(4):415-25.
- 1032 Ikegami M, Jobe A, Newnham J, Polk D, Willet K, Sly P. Repetitive prenatal glucocorticoids improve lung function  
1033 and decrease growth in preterm lambs. *Am J Respir Crit Care Med.* 1997;156(1):178-84.
- 1034 Irving R, Belton N, Elton R, Walker R. Adult cardiovascular risk factors in premature babies. *Lancet.*  
1035 2000;355(9221):2135-36.
- 1036 Jessop DS, Turner-Cobb JM. Measurement and meaning of salivary cortisol: A focus on health and disease in  
1037 children. *Stress.* 2007:1-14
- 1038 Johns D, Pierce R. Pocket guide to spirometry. Sydney: McGraw-Hill; 2003.
- 1039 Jongmans M, Mercuri E, Dubowitz L, Henderson S. Perceptual-motor difficulties and their concomitants in six-year-  
1040 old children born prematurely. *Human Movement Science.* 1998;17:629-53.
- 1041 Joseph K, Kramer M, Marcoux S, Ohlsson A, Wen S, Allen A, *et al.* Determinants of preterm birth rates in Canada  
1042 from 1981 through 1983 and from 1992 through 1994. *New Engl J Med.* 1998;339(20):1434-39.
- 1043 Kalkwarf HJ, Zemel BS, Gilsanz V, Lappe JM, Horlick M, Oberfield S, *et al.* The bone mineral density in childhood  
1044 study: bone mineral content and density according to age, sex, and race. *J Clin Endocrinol Metab.*  
1045 2007;92(6):2087-99.
- 1046 Kirschbaum C, Hellhammer DH. Salivary cortisol in psychobiological research: an overview. *Neuropsychobiology.*  
1047 1989;22(3):150-69.
- 1048 Kumar P, Seshadri R, Grobman WA. Neurodevelopmental outcome of very low birth weight infants after multiple  
1049 courses of antenatal corticosteroids. *J Soc Gynecol Investig.* 2004;11(7):483-7.
- 1050 Langley-Evans SC. Intrauterine programming of hypertension by glucocorticoids. *Life Sci.* 1997;60(15):1213-21.
- 1051 Leon DA, Johansson M, Rasmussen F. Gestational age and growth rate of fetal mass are inversely associated with  
1052 systolic blood pressure in young adults: an epidemiologic study of 165,136 Swedish men aged 18 years. *Am  
1053 J Epidemiol.* 2000;152(7):597-604.
- 1054 Leonard MB, Shults J, Elliott DM, Stallings VA, Zemel BS. Interpretation of whole body dual energy X-ray  
1055 absorptiometry measures in children: comparison with peripheral quantitative computed tomography. *Bone.*  
1056 2004;34(6):1044-52.
- 1057 Levine A, Zagoory-Sharon O, Feldman R, Lewis JG, Weller A. Measuring cortisol in human psychobiological  
1058 studies. *Physiol Behav.* 2007;90(1):43-53.
- 1059 Levitt NS, Lindsay RS, Holmes MC, Seckl JR. Dexamethasone in the last week of pregnancy attenuates  
1060 hippocampal glucocorticoid receptor gene expression and elevates blood pressure in the adult offspring in the  
1061 rat. *Neuroendocrinology.* 1996;64(6):412-8.
- 1062 Liggins GC, Howie RN. A controlled trial of antepartum glucocorticoid treatment for prevention of the respiratory  
1063 distress syndrome in premature infants. *Pediatrics.* 1972;50(4):515-25.
- 1064 Lucas JS, Inskip HM, Godfrey KM, Foreman CT, Warner JO, Gregson RK, *et al.* Small size at birth and greater  
1065 postnatal weight gain: relationships to diminished infant lung function. *Am J Respir Crit Care Med.*  
1066 2004;170(5):534-40.

- 1067 MacArthur B, Howie R, Dezoete J, Elkins J. School progress and cognitive development of 6-year old children  
1068 whose mothers were treated antenatally with betamethasone. *Pediatrics*. 1982;70(1):99-105.
- 1069 Manly T, Robertson I, Anderson V, Nimmo-Smith I. *The Test of Everyday Attention for Children*. Suffolk, UK:  
1070 Thames Valley Test Company; 1999.
- 1071 Margulies L, Horlick M, Thornton JC, Wang J, Ioannidou E, Heymsfield SB. Reproducibility of pediatric whole  
1072 body bone and body composition measures by dual-energy X-ray absorptiometry using the GE Lunar  
1073 Prodigy. *J Clin Densitom*. 2005;8(3):298-304.
- 1074 Marshall WA, Tanner JM. Variations in the pattern of pubertal changes in girls. *Arch Dis Child*. 1969;44(235):291-  
1075 303.
- 1076 Marshall WA, Tanner JM. Variations in the pattern of pubertal changes in boys. *Arch Dis Child*. 1970;45(239):13-  
1077 23.
- 1078 Martin BC, Warram JH, Krolewski AS, Bergman RN, Soeldner JS, Kahn CR. Role of glucose and insulin resistance  
1079 in development of type 2 diabetes mellitus: results of a 25-year follow-up study. *Lancet*.  
1080 1992;340(8825):925-9.
- 1081 Martin N. *Test of Visual-Perceptual Skills (no-motor)*. 3rd ed: Academic Therapy Publications; 2006.
- 1082 McEvoy C, Bowling S, Williamson K, Collins J, Tolaymat L, Maher J. Timing of antenatal corticosteroids and  
1083 neonatal pulmonary mechanics. *Am J Obstet Gynecol*. 2000;183(4):895-9.
- 1084 McEvoy C, Bowling S, Williamson K, Lozano D, Tolaymat L, Izquierdo L, *et al*. The effect of a single remote  
1085 course versus weekly courses of antenatal corticosteroids on functional residual capacity in preterm infants: a  
1086 randomized trial. *Pediatrics*. 2002;110(2 Pt 1):280-4.
- 1087 McLaughlin KJ, Crowther CA, Vigneswaran P, Hancock E, Willson K. Who remains undelivered more than seven  
1088 days after a single course of prenatal corticosteroids and gives birth at less than 34 weeks? *Aust N Z J Obstet*  
1089 *Gynaecol*. 2002;42(4):353-7.
- 1090 McLaughlin KJ, Crowther CA, Walker N, Harding JE. Effects of a single course of corticosteroids given more than  
1091 7 days before birth: a systematic review. *Aust NZ J Obstet Gynaecol*. 2003;43(2):101-6.
- 1092 Mildenhall LFJ, Battin MR, Morton SMB, Bevan C, Kuschel CA, Harding JE. Exposure to repeat doses of antenatal  
1093 glucocorticoids is associated with altered cardiovascular status after birth. *Arch Dis Child Fetal Neonatal Ed*.  
1094 2006;91(1):F56-60.
- 1095 Modi N, Lewis H, Al-Naqeeb N, Ajayi-Obe M, Dore CJ, Rutherford M. The effects of repeated antenatal  
1096 glucocorticoid therapy on the developing brain. *Pediatr Res*. 2001;50(5):581-5.
- 1097 Molgaard C, Thomsen BL, Prentice A, Cole TJ, Michaelsen KF. Whole body bone mineral content in healthy  
1098 children and adolescents. *Arch Dis Child*. 1997;76(1):9-15.
- 1099 Moss TJM, Doherty DA, Nitsos I, Sloboda DM, Harding R, Newnham JP. Effects into adulthood of single or  
1100 repeated antenatal corticosteroids in sheep. *Am J Obstet Gynecol*. 2005;192(1):146-52.
- 1101 Murphy K. MULTIPLE COURSES OF ANTENATAL CORTICOSTEROIDS FOR PRETERM BIRTH: MACS  
1102 COLLABORATIVE GROUP (Abstract). *Am J Obstet Gynaecol*. 2007;197(6):Suppl 1; S2.
- 1103 National Institutes of Health. Effect of corticosteroids for fetal maturation on perinatal outcomes. Consensus  
1104 Statement. 1994;12(2):1-24.
- 1105 National Institutes of Health. Antenatal corticosteroids revisited: repeat courses. NIH Consensus Statement.  
1106 2000;17(2):1-18.
- 1107 New Zealand Health Information Service. Maternity and newborn information.  
1108 <http://www.moh.govt.nz/moh.nsf/indexns/stats>; 2008.

- 1109 Ng P, Wong G, Lam C, Lee C, Fok T, Wong M, *et al.* Pituitary-adrenal suppression and recovery in preterm very  
1110 low birth weight infants after dexamethasone treatment for bronchopulmonary dysplasia. *J Clin Endocrinol*  
1111 *Metab.* 1997;82(8):2429-32.
- 1112 Njeh CF, Fuerst T, Hans D, Blake GM, Genant HK. Radiation exposure in bone mineral density assessment. *Appl*  
1113 *Radiat Isot.* 1999;50(1):215-36.
- 1114 O'Brien E. Replacing the mercury sphygmomanometer. Requires clinicians to demand better automated devices.  
1115 *BMJ.* 2000;320(7238):815-6.
- 1116 O'Brien E, Asmar R, Beilin L, Imai Y, Mallion J-M, Mancia G, *et al.* European Society of Hypertension  
1117 recommendations for conventional, ambulatory and home blood pressure measurement. *J Hypertens.*  
1118 2003;21(5):821-48.
- 1119 Owen D, Banjanin S, Gidrewicz D, McCabe L, Matthews SG. Central regulation of the hypothalamic-pituitary-  
1120 adrenal axis during fetal development in the Guinea-pig. *J Neuroendocrinol.* 2005;17(4):220-6.
- 1121 Palisano R, Rosenbaum P, Walter S, Russell D, Wood E, Galuppi B. Development and reliability of a system to  
1122 classify gross motor function in children with cerebral palsy. *Dev Med Child Neurol.* 1997;39(4):214-23.
- 1123 Pe' rez-Padilla R, Va' zquez-Garci' a J, Ma' rquez M, Jardim J, Pertuze J, Lisboa C, *et al.* The long-term stability of  
1124 portable spirometers used in a multinational study of the prevalence of Chronic Obstructive Pulmonary  
1125 Disease. *Respir Care.* 2006;51(10):1167-71.
- 1126 Peltoniemi O, Kari M, Tammela O, Lehtonen L, Marttila R, Halmesmäki E, *et al.* Randomized trial of a single  
1127 repeat dose of prenatal betamethasone treatment in imminent preterm birth. *Pediatrics.* 2007;119(2):290-8.
- 1128 Pickering TG, Hall JE, Appel LJ, Falkner BE, Graves JW, Hill MN, *et al.* Recommendations for blood pressure  
1129 measurement in humans: an AHA scientific statement from the Council on High Blood Pressure Research  
1130 Professional and Public Education Subcommittee. *J Clin Hypertens (Greenwich).* 2005;7(2):102-9.
- 1131 Pike K, Hanson M, Godfrey K. Developmental mismatch: consequences for later cardiorespiratory health. *British J*  
1132 *Obstet Gynaecol.* 2008;115:149-57.
- 1133 Poll E-M, Kreitschmann-Andermahr I, Langejuergen Y, Stanzel S, Gilsbach JM, Gressner A, *et al.* Saliva collection  
1134 method affects predictability of serum cortisol. *Clin Chim Acta.* 2007;382(1-2):15-9.
- 1135 Prentice A, Parsons TJ, Cole TJ. Uncritical use of bone mineral density in absorptiometry may lead to size-related  
1136 artifacts in the identification of bone mineral determinants. *Am J Clin Nutr.* 1994;60(6):837-42.
- 1137 Quinlivan JA, Archer MA, Dunlop SA, Evans SF, Beazley LD, Newnham JP. Fetal growth retardation, particularly  
1138 within lymphoid organs, following repeated maternal injections of betamethasone in sheep. *J Obstet*  
1139 *Gynaecol Res.* 1998;24(3):173-82.
- 1140 Quinlivan JA, Evans SF, Dunlop SA, Beazley LD, Newnham JP. Use of corticosteroids by Australian obstetricians--  
1141 a survey of clinical practice. *Aust N Z J Obstet Gynaecol.* 1998;38(1):1-7.
- 1142 Regan FM, Cutfield WS, Jefferies C, Robinson E, Hofman PL. The impact of early nutrition in premature infants on  
1143 later childhood insulin sensitivity and growth. *Pediatrics.* 2006;118(5):1943-9.
- 1144 Rey A. L'examen clinique en psychologie. Paris: Presses Universitaires de France; 1964.
- 1145 Rey A. Psychological examination of traumatic encephalopathy (translation). *The Clinical Neuropsychologist.*  
1146 1993;7:3-21.
- 1147 Rickards A, Kitchen W, Doyle L, Kelly E. Correction of developmental and intelligence test scores for premature  
1148 birth. 1989;25:127-9.
- 1149 Roberts D, Dalziel S. Antenatal corticosteroids for accelerating fetal lung maturation for women at risk of preterm  
1150 birth. *Cochrane Database Syst Rev.* 2006;(3):Art. No.: CD004454. DOI: 10.1002/14651858.CD004454.pub2.
- 1151 Rose SA, Feldman JF, Jankowski JJ. The building blocks of cognition. *J Pediatr.* 2003;143(4 Suppl):S54-61.

- 1152 Rosmalen JGM, Oldehinkel AJ, Ormel J, de Winter AF, Buitelaar JK, Verhulst FC. Determinants of salivary  
 1153 cortisol levels in 10-12 year old children: a population-based study of individual differences.  
 1154 *Psychoneuroendocrinology*. 2005;30(5):483-95.
- 1155 Rosner B, Prineas R, Loggie J, Daniels S. Blood pressure nomograms for children and adolescents, by height, sex,  
 1156 and age, in the United States. *J Pediatr*. 1993;123(6):871-86.
- 1157 Saad MF, Steil GM, Kades WW, Ayad MF, Elsewafy WA, Boyadjian R, *et al*. Differences between the  
 1158 tolbutamide-boosted and the insulin-modified minimal model protocols. *Diabetes*. 1997;46(7):1167-71.
- 1159 Saad MF, Steil GM, Riad-Gabriel M, Khan A, Sharma A, Boyadjian R, *et al*. Method of insulin administration has  
 1160 no effect on insulin sensitivity estimates from the insulin-modified minimal model protocol. *Diabetes*.  
 1161 1997;46(12):2044-8.
- 1162 Saigal S, Feeny D, Furlong W, Rosenbaum P, Burrows E, Torrance G. Comparison of the health-related quality of  
 1163 life of extremely low birth weight children and a reference group of children at age eight years. *J Pediatr*.  
 1164 1994;125(3):418-25.
- 1165 Sanchez MM, Gilsanz V. Pediatric DXA bone measurements. *Pediatr Endocrinol Rev*. 2005;2 Suppl 3:337-41.
- 1166 Schmand B, Neuvel J, Smolders-de Haas H, Hoeks J, Treffers PE, Koppe JG. Psychological development of  
 1167 children who were treated antenatally with corticosteroids to prevent respiratory distress syndrome.  
 1168 *Pediatrics*. 1990;86(1):58-64.
- 1169 Schwartz GJ, Haycock GB, Edelmann CM, Jr., Spitzer A. A simple estimate of glomerular filtration rate in children  
 1170 derived from body length and plasma creatinine. *Pediatrics*. 1976;58(2):259-63.
- 1171 Schwartz GJ, Furth SL. Glomerular filtration rate measurement and estimation in chronic kidney disease. *Pediatr*  
 1172 *Nephrol*. 2007;22(11):1839-48.
- 1173 Seckl JR. Glucocorticoid programming of the fetus; adult phenotypes and molecular mechanisms. *Mol Cell*  
 1174 *Endocrinol*. 2001;185(1-2):61-71.
- 1175 Sewell J, Oberklaid F, Prior M, Sanson A, Kyrios M. Temperament in Australian toddlers. *Aust Paediatr J*.  
 1176 1988;24(6):343-5.
- 1177 Shaheen SO, Newson RB, Henderson AJ, Emmett PM, Sherriff A, Cooke M, *et al*. Umbilical cord trace elements  
 1178 and minerals and risk of early childhood wheezing and eczema. *Eur Respir J*. 2004;24(2):292-7.
- 1179 Shinwell ES, Karplus M, Reich D, Weintraub Z, Blazer S, Bader D, *et al*. Early postnatal dexamethasone treatment  
 1180 and increased incidence of cerebral palsy. *Arch Dis Child Fetal Neonatal Ed*. 2000;83(3):F177-81.
- 1181 Sloboda DM, Moss T, Gurrin L, Newnham JP, Challis J. The effect of prenatal betamethasone administration on  
 1182 postnatal ovine hypothalamic-pituitary-adrenal function. *J Endocrinol*. 2002;172(1):71-81.
- 1183 Sloboda DM, Challis JRG, Moss TJM, Newnham JP. Synthetic glucocorticoids: antenatal administration and long-  
 1184 term implications. *Curr Pharm Des*. 2005;11(11):1459-72.
- 1185 Sloboda DM, Moss T, Li S, Doherty D, Nitsos I, Challis JRG, *et al*. Prenatal betamethasone exposure results in  
 1186 pituitary-adrenal hyporesponsiveness in adult sheep. *Am J Physiol Endocrinol Metab*. 2007;292(1):E61-70.
- 1187 Soergel M, Kirschstein M, Busch C, Danne T, Gellermann J, Holl R, *et al*. Oscillometric twenty-four-hour  
 1188 ambulatory blood pressure values in healthy children and adolescents: a multicenter trial including 1141  
 1189 subjects. *J Pediatr*. 1997;130(2):178-84.
- 1190 Sopher AB, Thornton JC, Wang J, Pierson RN, Jr., Heymsfield SB, Horlick M. Measurement of percentage of body  
 1191 fat in 411 children and adolescents: a comparison of dual-energy X-ray absorptiometry with a four-  
 1192 compartment model. *Pediatrics*. 2004;113(5):1285-90.
- 1193 Specker BL, Schoenau E. Quantitative bone analysis in children: current methods and recommendations. *J Pediatr*.  
 1194 2005;146(6):726-31.

- 1195 Spinillo A, Viazzo F, Colleoni R, Chiara A, Maria Cerbo R, Fazzi E. Two-year infant neurodevelopmental outcome  
 1196 after single or multiple antenatal courses of corticosteroids to prevent complications of prematurity. *Am J*  
 1197 *Obstet Gynecol.* 2004;191(1):217-24.
- 1198 Stewart JD, Sienko AE, Gonzalez CL, Christensen HD, Rayburn WF. Placebo-controlled comparison between a  
 1199 single dose and a multidose of betamethasone in accelerating lung maturation of mice offspring. *Am J Obstet*  
 1200 *Gynecol* 1998;179(5):1241-47.
- 1201 Stick S. Pediatric origins of adult lung disease. 1. The contribution of airway development to paediatric and adult  
 1202 lung disease. *Thorax.* 2000;55(7):587-94.
- 1203 Strazdins L, Meyerkort S, Brent V, D'Souza RM, Broom DH, Kyd JM. Impact of saliva collection methods on sIgA  
 1204 and cortisol assays and acceptability to participants. *J Immunol Methods.* 2005;307(1-2):167-71.
- 1205 Stutchfield P, Whitaker R, Russell I. Antenatal betamethasone and incidence of neonatal respiratory distress after  
 1206 elective caesarean section: pragmatic randomised trial. *BMJ.* 2005;331(7518):662.
- 1207 Swolin-Eide D, Dahlgren J, Nilsson C, Albertsson Wikland K, Holmang A, Ohlsson C. Affected skeletal growth but  
 1208 normal bone mineralization in rat offspring after prenatal dexamethasone exposure. *J Endocrinol.*  
 1209 2002;174(3):411-8.
- 1210 Takahashi R, Yamada M, Takahashi T, Ito T, Nakae S, Kobayashi Y, *et al.* Risk factors for cerebral palsy in preterm  
 1211 infants. *Early Hum Dev.* 2005;81(6):545-53.
- 1212 Thompson C, Syddall H, Rodin I, Osmond C, Barker D. Birth weight and the risk of depressive disorder in late life.  
 1213 *Br J Psychiatry.* 2001;179:450-5.
- 1214 Thompson DK, Warfield SK, Carlin JB, Pavlovic M, Wang HX, Bear M, *et al.* Perinatal risk factors altering  
 1215 regional brain structure in the preterm infant. *Brain.* 2007;130(Pt 3):667-77.
- 1216 Thorp JA, Jones AM, Hunt C, Clark R. The effect of multidose antenatal betamethasone on maternal and infant  
 1217 outcomes. *Am J Obstet Gynecol.* 2001;184(2):196-202.
- 1218 Tschanz SA, Damke BM, Burri PH. Influence of postnatally administered glucocorticoids on rat lung growth. *Biol*  
 1219 *Neonate.* 1995;68(4):229-45.
- 1220 Tucker J, McGuire W. Epidemiology of preterm birth. *BMJ.* 2004;329:675-78.
- 1221 Uthaya S, Thomas EL, Hamilton G, Dore CJ, Bell J, Modi N. Altered adiposity after extremely preterm birth.  
 1222 *Pediatr Res.* 2005;57(2):211-5.
- 1223 Vining RF, McGinley RA, Maksvytis JJ, Ho KY. Salivary cortisol: a better measure of adrenal cortical function  
 1224 than serum cortisol. *Ann Clin Biochem.* 1983;20(Pt 6):329-35.
- 1225 Walters J, Wood-baker R, Walls J, Johns D. Stability of the EasyOne ultrasonic spirometer for use in general  
 1226 practice. *Respirology.* 2006;11:306-10.
- 1227 Wapner RJ, Sorokin Y, Thom EA, Johnson F, Dudley DJ, Spong CY, *et al.* Single versus weekly courses of  
 1228 antenatal corticosteroids: evaluation of safety and efficacy. *Am J Obstet Gynecol.* 2006;195(3):633-42.
- 1229 Wapner RJ, Sorokin Y, Mele L, Johnson F, Dudley DJ, Spong CY, *et al.* Long-term outcomes after repeat doses of  
 1230 antenatal corticosteroids. *N Engl J Med.* 2007;357(12):1190-8.
- 1231 Ward KA, Ashby RL, Roberts SA, Adams JE, Zulf Mughal M. UK reference data for the Hologic QDR Discovery  
 1232 dual-energy x ray absorptiometry scanner in healthy children and young adults aged 6-17 years. *Arch Dis*  
 1233 *Child.* 2007;92(1):53-9.
- 1234 Waters E, Salmon L, Wake M, Hesketh K, Wright M. The Child Health Questionnaire in Australia: reliability,  
 1235 validity and population means. *Aust N Z J Public Health.* 2000;24(2):207-10.
- 1236 Wechsler D. *The Wechsler Abbreviated Scale of Intelligence.* San Antonio: The Psychological Corporation; 1999.

- 1237 Welberg LA, Seckl JR. Prenatal stress, glucocorticoids and the programming of the brain. *J Neuroendocrinol.*  
1238 2001;13(2):113-28.
- 1239 Wilkinson G, Robertson G. *Wide Range Achievement Test*. 4th ed. Wilmington, Delaware; 2005.
- 1240 Willet KE, Jobe AH, Ikegami M, Kovar J, Sly PD. Lung morphometry after repetitive antenatal glucocorticoid  
1241 treatment in preterm sheep. *Am J Respir Crit Care Med.* 2001;163(6):1437-43.
- 1242 Woodside DB, Winter K, Fisman S. Salivary cortisol in children: correlations with serum values and effect of  
1243 psychotropic drug administration. *Can J Psychiatry.* 1991;36(10):746-8.
- 1244 Wuhl E, Witte K, Soergel M, Mehls O, Schaefer F, German Working Group on Pediatric Hypertension. Distribution  
1245 of 24-h ambulatory blood pressure in children: normalized reference values and role of body dimensions. *J*  
1246 *Hypertens.* 2002;20(10):1995-2007.
- 1247
- 1248
