# Supplementary material for: Association of Fetal Growth Restriction With Neurocognitive Function After Repeated Antenatal Betamethasone Treatment vs Placebo: Secondary Analysis of the ACTORDS Randomized Clinical Trial
Source: PubMed Central journal article supplement (PMC6484607; doi:10.1001/jamanetworkopen.2018.7636), 2019-02-01
Supplement: jamanetwopen-2-e187636-s002.pdf [file jamanetwopen-2-e187636-s002.pdf]

## Supplementary Online Content

Cartwright R, Crowther CA, Anderson PJ, Harding JE, Doyle LW, McKinlay CJD. Association of fetal growth restriction and neurocognitive function after repeated antenatal betamethasone treatment vs placebo: secondary analysis of the ACTORDS randomized clinical trial. *JAMA Netw Open*. 2019;2(2):e187636. doi:10.1001/jamanetworkopen.2018.7636

**eTable.** Primary and Secondary Neurocognitive Outcomes at Midchildhood of Children With and Without Fetal Growth Restriction (FGR)

This supplementary material has been provided by the authors to give readers additional information about their work.

**eTable. Primary and Secondary Neurocognitive Outcomes at Midchildhood of Children With and Without Fetal Growth Restriction (FGR)**

| Outcome                                      | FGR         | No. of Participants | Non-FGR      | No. of Participants | Treatment effect: OR or MD (95% CI) | P Value |
|----------------------------------------------|-------------|---------------------|--------------|---------------------|-------------------------------------|---------|
| Survival free of any disability†             | 199 (73.7%) | 270                 | 550 (79.4%)  | 693                 | 0.9 (0.9 to 1.0)                    | .10     |
| Death or moderate/severe disability†         | 41 (15.2%)  | 270                 | 65 (9.4%)    | 693                 | 1.6 (1.1 to 2.4)                    | .02     |
| <i>Cognition</i>                             |             |                     |              |                     |                                     |         |
| Full scale IQ                                | 97.4 (15.3) | 241                 | 100.7 (16.2) | 648                 | -3.3 (-5.8 to -0.8)                 | .008    |
| Full scale IQ <85                            | 35 (14.5%)  | 241                 | 81 (12.5%)   | 648                 | 1.2 (0.8 to 1.7)                    | .44     |
| <i>Motor</i>                                 |             |                     |              |                     |                                     |         |
| Cerebral palsy                               | 11 (4.2%)   | 261                 | 28 (3.9%)    | 726                 | 1.1 (0.6 to 2.2)                    | .78     |
| Low movement ABC Total Score (<15th centile) | 79 (33.3%)  | 237                 | 144 (22.9%)  | 630                 | 1.5 (1.2 to 1.8)                    | .002    |
| <i>Attention: TEA-Ch</i>                     |             |                     |              |                     |                                     |         |
| Selective – Sky Search                       | 9.0 (3.3)   | 233                 | 9.2 (3.2)    | 621                 | -0.2 (-0.7 to 0.3)                  | .44     |
| Sustained – Score!                           | 8.9 (3.7)   | 226                 | 8.7 (3.5)    | 604                 | 0.2 (-0.4 to 0.8)                   | .51     |
| Shifting – Creature Counting                 | 9.0 (3.7)   | 194                 | 9.8 (3.6)    | 553                 | -0.8 (-1.4 to -0.1)                 | .02     |
| Divided – Sky Search Dual Task               | 56.6 (28.7) | 216                 | 60.3 (29.3)  | 582                 | -3.7 (-8.3 to 0.9)                  | .12     |
| <i>Executive Function</i>                    |             |                     |              |                     |                                     |         |
| Rey Complex Figure Accuracy Score            | 14.4 (7.3)  | 230                 | 15.8 (7.9)   | 618                 | -1.5 (-2.7 to -0.3)                 | .02     |
| Rey Complex Figure Organisation Score        | 3.6 (1.2)   | 230                 | 3.7 (1.2)    | 615                 | -0.1 (-0.3 to 0.0)                  | .14     |
| Fruit Stroop, number correct (trial 4)       | 19.6 (8.1)  | 225                 | 20.4 (8.5)   | 604                 | -0.8 (-2.1 to 0.6)                  | .26     |
| <i>Academic skills</i>                       |             |                     |              |                     |                                     |         |
| Reading                                      | 97.0 (16.3) | 228                 | 99.9 (17.5)  | 630                 | -2.9 (-5.7 to 0.0)                  | .05     |
| Spelling                                     | 98.5 (15.2) | 226                 | 100.8 (16.5) | 628                 | -2.3 (-5.0 to 0.4)                  | .10     |
| Mathematics                                  | 95.0 (15.5) | 227                 | 97.3 (16.0)  | 626                 | -2.3 (-4.9 to 0.3)                  | .08     |
| <i>Parental rating of behaviour</i>          |             |                     |              |                     |                                     |         |
| SDQ Total Difficulties Score                 | 10.9 (6.2)  | 229                 | 10.8 (6.8)   | 636                 | 0.1 (-0.9 to 1.2)                   | .81     |
| BRIEF Global Executive Composite T-Score     | 52.0 (12.4) | 226                 | 52.3 (12.9)  | 631                 | -0.3 (-2.3 to 1.7)                  | .78     |
| CADS ADHD Index T-Score                      | 51.3 (6.5)  | 231                 | 51.3 (7.0)   | 636                 | 0.1 (-1.0 to 1.1)                   | .92     |

Data are percent (number) and mean (standard deviation). OR, odds ratio; MD, mean difference. IQ, intelligence quotient; TEA-Ch, Test of Everyday Attention for Children.

† Disability defined as any of cerebral palsy, blindness or deafness, or IQ <85; moderate/severe disability defined as deafness, moderate/severe cerebral palsy, or IQ <70. Subgroups compared using a generalised linear model. Adjusted for adjusted for clustering of children from multiple pregnancy.
